# Structure induces computational function in networks with diverse types of spiking neurons

Christoph Stöckl<sup>1</sup>, Dominik Lang<sup>1</sup>, and Wolfgang Maass<sup>1</sup>

<sup>1</sup>*Institute of Theoretical Computer Science, Graz University of Technology, Austria*

July 6, 2022

**Abstract:** Nature endows networks of spiking neurons in the brain with innate computing capabilities. But it has remained an open problem how the genome achieves that. Experimental data imply that the genome encodes synaptic connection probabilities between neurons depending on their genetic types and spatial distance. We show that this low-dimensional parameterization suffices for programming fundamental computing capabilities into networks of spiking neurons. However, this method is only effective if the network employs a substantial number of different neuron types. This provides an intriguing answer to the open question why the brain employs so many neuron types, many more than were used so far in neural network models. Neural networks whose computational function is induced through their connectivity structure, rather than through synaptic plasticity, are distinguished by short wire length and robustness to weight perturbations. These neural networks features are not only essential for the brain, but also for energy-efficient neuromorphic hardware.

**Keywords:** cortical microcircuits, innate computing capabilities, structure/function relationship in neural networks

**Significance statement:** Fundamental computing capabilities of neural networks in the brain are innate, i.e., they do not depend on experience-dependent plasticity. Examples are the capability to recognize odors of poisonous food, and the capability to stand up and walk right after birth. But it has remained unknown how the genetic code can achieve that. A prominent aspect of neural networks of the brain that is under genetic control is the connection probability between neurons of different types. We show that this low-dimensional code suffices for inducing substantial innate computing capabilities in neural networks, provided they have –like the brain– a fair number of different neuron types. Hence under this condition structure can induce computational function in neural networks.

## 1 Introduction

### 33 1 Introduction

34 The common paradigm for bringing computational function into neural networks, in-  
35 cluding models for neural networks of the brain, is to tune their very large number of  
36 synaptic weights by a learning process, starting from a tabula rasa initial state. This  
37 typically requires very large numbers of training examples, which are for many tasks not  
38 readily available. Nature has invented a powerful alternative: The genetic code endows  
39 neural networks of the brain with an exquisite structure that induces numerous compu-  
40 tational capabilities without a need for experience-dependent plasticity, see Zador, 2019  
41 for a review, and (Apfelbach et al., 2005, Yilmaz and Meister, 2013, Tinbergen, 2020,  
42 Weber and Hoekstra, 2009, Metz et al., 2017, Langston et al., 2010, Mckone, Crookes,  
43 and Kanwisher, 2009) for experimental data. In fact, innate functional capabilities, such  
44 as avoidance of poisonous food and the capability to stand up and walk right after birth,  
45 are in many cases crucial for survival. However, it has remained an open problem how  
46 the genetic code achieves that. Nature must have found a way to encode the compu-  
47 tational function through a low-dimensional parametrization, rather than by encoding  
48 individual synaptic weights, since even the human genome contains only about 1 GB of  
49 information (Zador, 2019). We show that known genetically encoded structural proper-  
50 ties of cortical microcircuits provide a solution to this problem. Experimental data on  
51 cortical microcircuits, such as Markram et al., 2015 and Billeh et al., 2020, prove that  
52 the genetic code determines connection probabilities in terms of the genetic type of the  
53 pre- and postsynaptic neuron and their spatial distance. We show that these structural  
54 features of networks of spiking neurons suffice for inducing specific computational func-  
55 tions. This insight provides simultaneously an answer to another open question: Why  
56 the brain employs so many neuron types, substantially more than we have commonly  
57 considered in neural network models.

58 We base our answers to these open problems on a new type of generative model, a  
59 probabilistic skeleton. Neural networks that are generated by a probabilistic skeleton  
60 share a number of salient statistical features with neural networks in the brain that are  
61 under genetic control, such as the number and prevalence of neuron types, and connection  
62 probabilities in terms of these neuron types.

63 Probabilistic skeletons generate just the architectures of neural networks, hence these  
64 can in principle employ any kinds of computational units. We focus here on networks that  
65 consist of excitatory and inhibitory spiking neurons (RSNNs). These are of particular  
66 interest for modelling neural networks of the brain because the activity of these units can  
67 be related directly to neural recordings from the brain, especially if the RSNN operates  
68 in an event-driven sparse firing regime where the timing of spikes can be used to encode  
69 salient information. However, it has turned out to be difficult to endow RSNNs with  
70 powerful computational capabilities through training, in particular if one wants that  
71 they operate in a sparse firing regime. Hence inducing function through structure is  
72 a particularly desirable tool for RSNNs. Producing computationally powerful RSNN  
73 models that operate in a sparse firing regime is also of interest in the quest to design  
74 more energy-efficient computing hardware for AI, because hardware implementations of  
75 sparsely active RSNNs tend to consume substantially less energy than customary digital

## 2 Results

76 computing hardware (Plank et al., 2022).

77 We will first define the concept of a probabilistic skeleton, and then show that they  
78 suffice to induce specific computing capabilities in RSNN. In particular, we consider  
79 examples for generic 2D computing capabilities of laminar cortical microcircuits, the  
80 capability to recognize particular spike patterns, and to carry out a generic motor con-  
81 trol task. Finally, we will elucidate principles of this new method to generate network  
82 function through network structure.

## 83 2 Results

### 84 2.1 Probabilistic skeletons provide a mathematical model for aspects of 85 network generation that are under genetic control

86 Current models of cortical microcircuits (Markram et al., 2015; Billeh et al., 2020) are  
87 based on two types of data: A set of neuron types -estimated to be well over 100 within  
88 a single neocortical area (Tasic et al., 2018) - and a table of connection probabilities  
89 for any pair of neuron types as in panel A of Fig. 4 in (Billeh et al., 2020), which is  
90 reproduced here as Fig. 1a. The entries of this table provide base connection probabil-  
91 ities that are valid if the somata have a horizontal distance of at most  $75\mu m$ . If the  
92 horizontal distance is larger, these base connection probabilities are multiplied with an  
93 exponentially decaying function of their distance. Examples of such functions are shown  
94 in panel C of Fig. 4 in (Billeh et al., 2020), reproduced here as Fig. 1b.

95 A probabilistic skeleton is a rigorous generative model for this indirect style of en-  
96 coding network architectures. It specifies the number  $K$  of neuron types, the prevalence  
97 of each neuron type (see the lower part of Fig. 1c), and base connection probabilities  
98 in dependence of neuron types (see the upper part of Fig. 1c). In addition, it specifies  
99 a parameter  $\sigma$  that scales the exponential decay of connection probabilities with the  
100 lateral distance between the somata according to equation 4 in Methods; see Fig. 1d for  
101 samples of exponential decays that were useful for tasks that we considered (although  
102 the precise shapes had little impact). A probabilistic skeleton does not specify the values  
103 of individual synaptic weights, but it specifies three parameters  $w_{in}$ ,  $w_E$ ,  $w_I$  that define  
104 the weight of each synaptic connection from an input neuron (i.e., a neuron that also  
105 receives synaptic input from outside of the RSNN), from an excitatory neuron that is not  
106 an input neuron, and from an inhibitory neuron that is not an input neuron. Input and  
107 output neurons (projection neurons) are from separate neuron types, and are assumed  
108 to be embedded into the RSNN (Fig. 1g). Neurons in the neocortex that are synaptically  
109 connected are usually connected by multiple synaptic connections, see e.g. Fig. 7A of  
110 (Markram et al., 2015). Hence we draw for each pair  $i, j$  of neurons not just once, but  $S$   
111 times from the corresponding connection probability, see equation 4. We used  $S = 8$  in  
112 the experiments that are reported here, but the exact value had little impact. The mul-  
113 tiplicity  $m_{ij}$  of synaptic connections between two neurons induces some differentiation  
114 in the effective strength (weight) by which two neurons are connected: One multiplies  
115 the corresponding parameter  $w_{in}$ ,  $w_E$ ,  $w_I$  that determines the uniform synaptic weight  
116 of all such synapses with the actual number of synaptic connections between the two

## 2 Results

117 neurons. Hence the effective strength of the connection between two neurons is drawn  
118 from binomial distributions for their connection probability, in dependence of their types  
119 and distance (Fig. 1f).

120 To sample a neural network from a probabilistic skeleton, one needs to specify its  
121 number of neurons  $N$ . One also needs to specify their spatial positions, because their  
122 distances are relevant for their connection probabilities. Actually, in the neocortex pri-  
123 marily the horizontal (lateral) distance within the 2D neocortical sheet is relevant for  
124 that. Therefore it suffices to distribute the neurons of each type uniformly over a 2D  
125 sheet. A convenient method for doing that is to let the 2D sheet consist of a grid of discs  
126 that each contain the same number of neurons with the specified prevalence of different  
127 neuron types, see Fig. 1e for an illustration (for tasks with small numbers of input or  
128 output neurons these were placed into selected subsets of the discs). For measuring hor-  
129 izontal distances between neurons we assume for simplicity that the neurons are always  
130 positioned at the center of a disc. In terms of neural anatomy each disc can be seen as  
131 a 2D projection of a minicolumn. It is well-known that the neocortical sheet is made  
132 up of stereotypical minicolumns of diameter around 60  $\mu\text{m}$  that extend vertically across  
133 all neocortical layers, and each contains a representative sample of together 80 - 120  
134 neurons of all types (Mountcastle, 1998, Cruz et al., 2005, DeFelipe, 2015).

135 Since a probabilistic skeleton only captures aspects of the architecture of neocortical  
136 neural networks that are under genetic control, one can use this concept to examine  
137 the impact of genetically encoded architectural features on computational properties of  
138 a neural network. If a probabilistic skeleton endows with high probability its neural  
139 network samples with a specific computing capability, this computing capability can be  
140 argued to be within the reach of genetic control (i.e., "innate").

## 2 Results

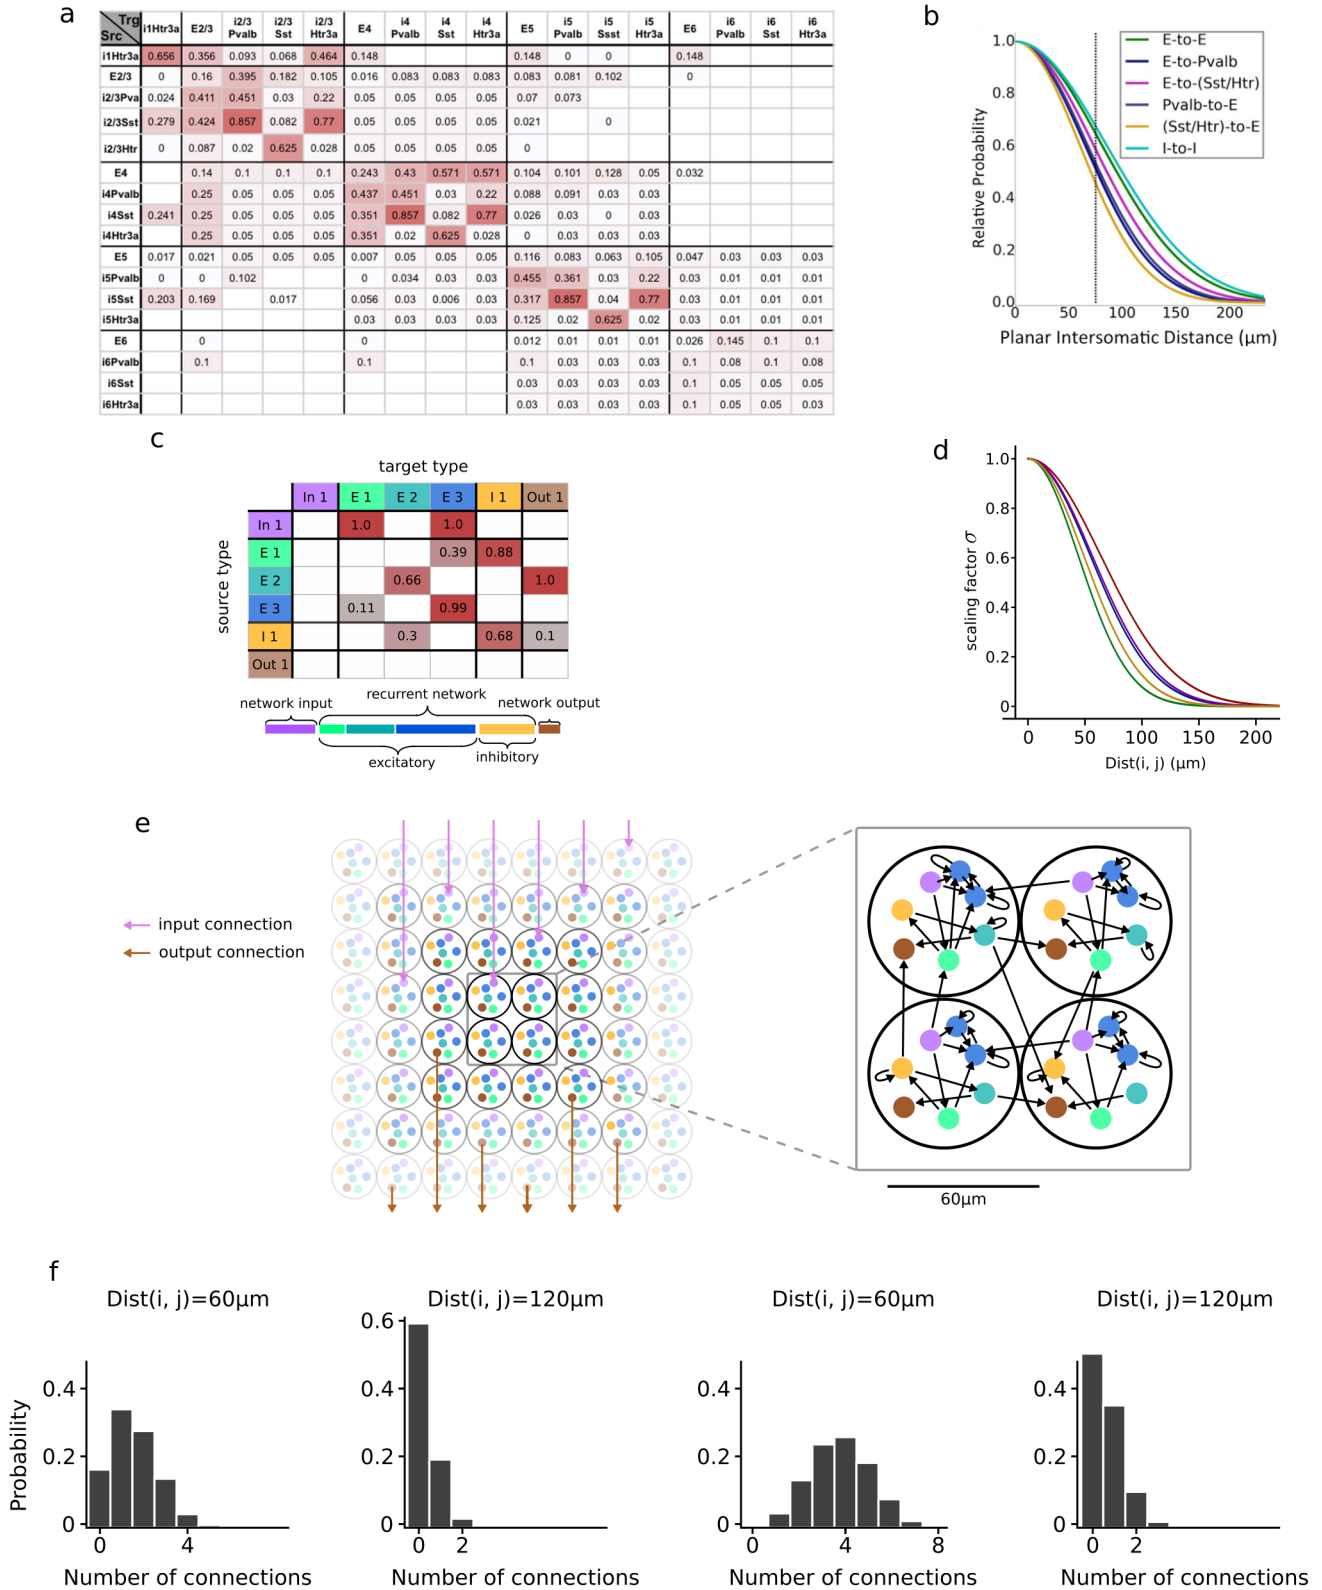

## 2 Results

**Figure 1: Illustration of a probabilistic skeleton and the process by which RSNNs are generated from it.** **a** Base connection probabilities between 17 types of neurons in mouse V1 (reproduced from (Billeh et al., 2020)). White table cells indicate unknown values. **b** Scaling of connection probabilities with the horizontal distance of their somata for mouse V1 (reproduced from (Billeh et al., 2020)). **c** Top: Sample base connection probability table of a probabilistic skeleton for the case of  $K = 6$  neuron types. White table cells indicate here that the corresponding base connection probability has value 0. Rows and columns labeled "in" refer to input neuron types, the label "out" refers to output neuron types, "E" ("I") to the other excitatory (inhibitory) types of neurons. Bottom: Prevalence-bar of a probabilistic skeleton. Its length defines the number  $M$  of neurons in a minicolumn. **d** Examples of distance-dependent scaling functions, with slightly different values of  $\sigma$  in equation (4). These functions turned out to work well for the computing tasks that we considered. **e** Illustration of the uniform distributions of neurons of all types over a 2D sheet for the generation of an RSNN from a probabilistic skeleton. Each disc can be seen as 2D projection of a stereotypical minicolumn in the neocortical sheet. Sample arrows in purple indicate for some of them external inputs (that arrive at the purple neurons in each disc). Network outputs from brown neurons in all discs are indicated by brown arrows from a random sample. Synaptic connections are not restricted to neurons in the same or neighboring disc, the blow-up might suggest, but are drawn according to a distribution as shown in b. **f** Examples for binomial distributions from which the number  $m_{ij}$  of synaptic connections (and hence the effective connection strength) from a neuron  $i$  of type  $I$  to a neuron  $j$  of type  $J$  are drawn for the case  $p_{I \rightarrow J} = 0.35$  (two panels on the left) and  $p_{I \rightarrow J} = 0.85$  (two panels on the right), each for two different values of the spatial distance  $\text{Dist}(i, j)$  between their somata.

141

142

143 We used evolution strategies (Schaul, Glasmachers, and Schmidhuber, 2011) to op-  
144 timize the parameters of a probabilistic skeleton for a given computational task, see  
145 Fig. 7 for an illustration. Note that a fitness function that measures the computational  
146 performance of RSNN samples from a probabilistic skeleton is not differentiable because  
147 RSNNs are sampled from it using a stochastic process.

### 148 2.2 Generic 2D computing capabilities of cortical microcircuits

149 The neocortex forms a 2D sheet composed of several parallel laminae or layers that each  
150 consist of different types of neurons (Mountcastle, 1998; Harris and Shepherd, 2015;  
151 Billeh et al., 2020). Sensory input streams and outputs from other brain areas also have  
152 a clear 2D structure, and they are mapped topographically onto specific layers of generic  
153 laminar cortical microcircuits. Of special importance is the capability to compare 2D  
154 patterns that arrive from lower brain areas and higher brain areas in hierarchical brain  
155 networks (Vezoli et al., 2021), typically with some time-gap in between. Hence we are  
156 focusing here on the task to decide whether two 2D patterns that arrive sequentially,  
157 with varying delays between them, in different 2D input layers, are similar or not (see

## 2 Results

158 Fig. 2a) . We demanded that a population of output neurons fires in the case of a  
159 non-match, in analogy to the error-reporting neurons found in the neocortex (Keller and  
160 Mrsic-Flogel, 2018). We found that a probabilistic skeleton with 7 recurrent neuron  
161 types, i.e., neuron types that are not marked as input or output neurons can solve this  
162 task convincingly (see Fig. 2). The resulting network connectivity of an RSNN sample  
163 is shown in section 1.1 in the Suppl. (Fig. S1), plotted in the same style (as chord  
164 diagram) as experimental data on network connectivity of the neocortex in Fig. 7C of  
165 Markram et al., 2015. The RSNN sample achieved an accuracy of 91.5%. Two trials,  
166 one of which should be judged as a "match" on the left, and a non-match trial on the  
167 right, are shown in Fig. 2c. Further trial input patterns can be seen in Fig. 2d and e.

168 A related task that is also arguably central to innate computing capabilities of cortical  
169 microcircuits is the identification of coincidences in two 2D input streams, that could  
170 arrive from different sensory areas, or from a higher and a lower cortical area -one  
171 indicating spatial attention and another visual input. An essential sub-computation,  
172 that is arguably innate, is to mark those locations where both 2D input patterns have  
173 substantial activity. This computational capability can also be induced by a probabilistic  
174 skeleton, using just 121 parameters, see Fig. S2 e - g.

175 Another innate computing capability is likely to be contrast enhancement, which can  
176 also be induced by a probabilistic skeleton (see section 1.2 in the Suppl. and Fig. S2 a -  
177 b and Fig. S3).

178 Altogether we found that fundamental 2D computing operations that are arguably  
179 central for computational operations in generic cortical microcircuits can be induced  
180 through genetically encoded network structure.

## 2 Results

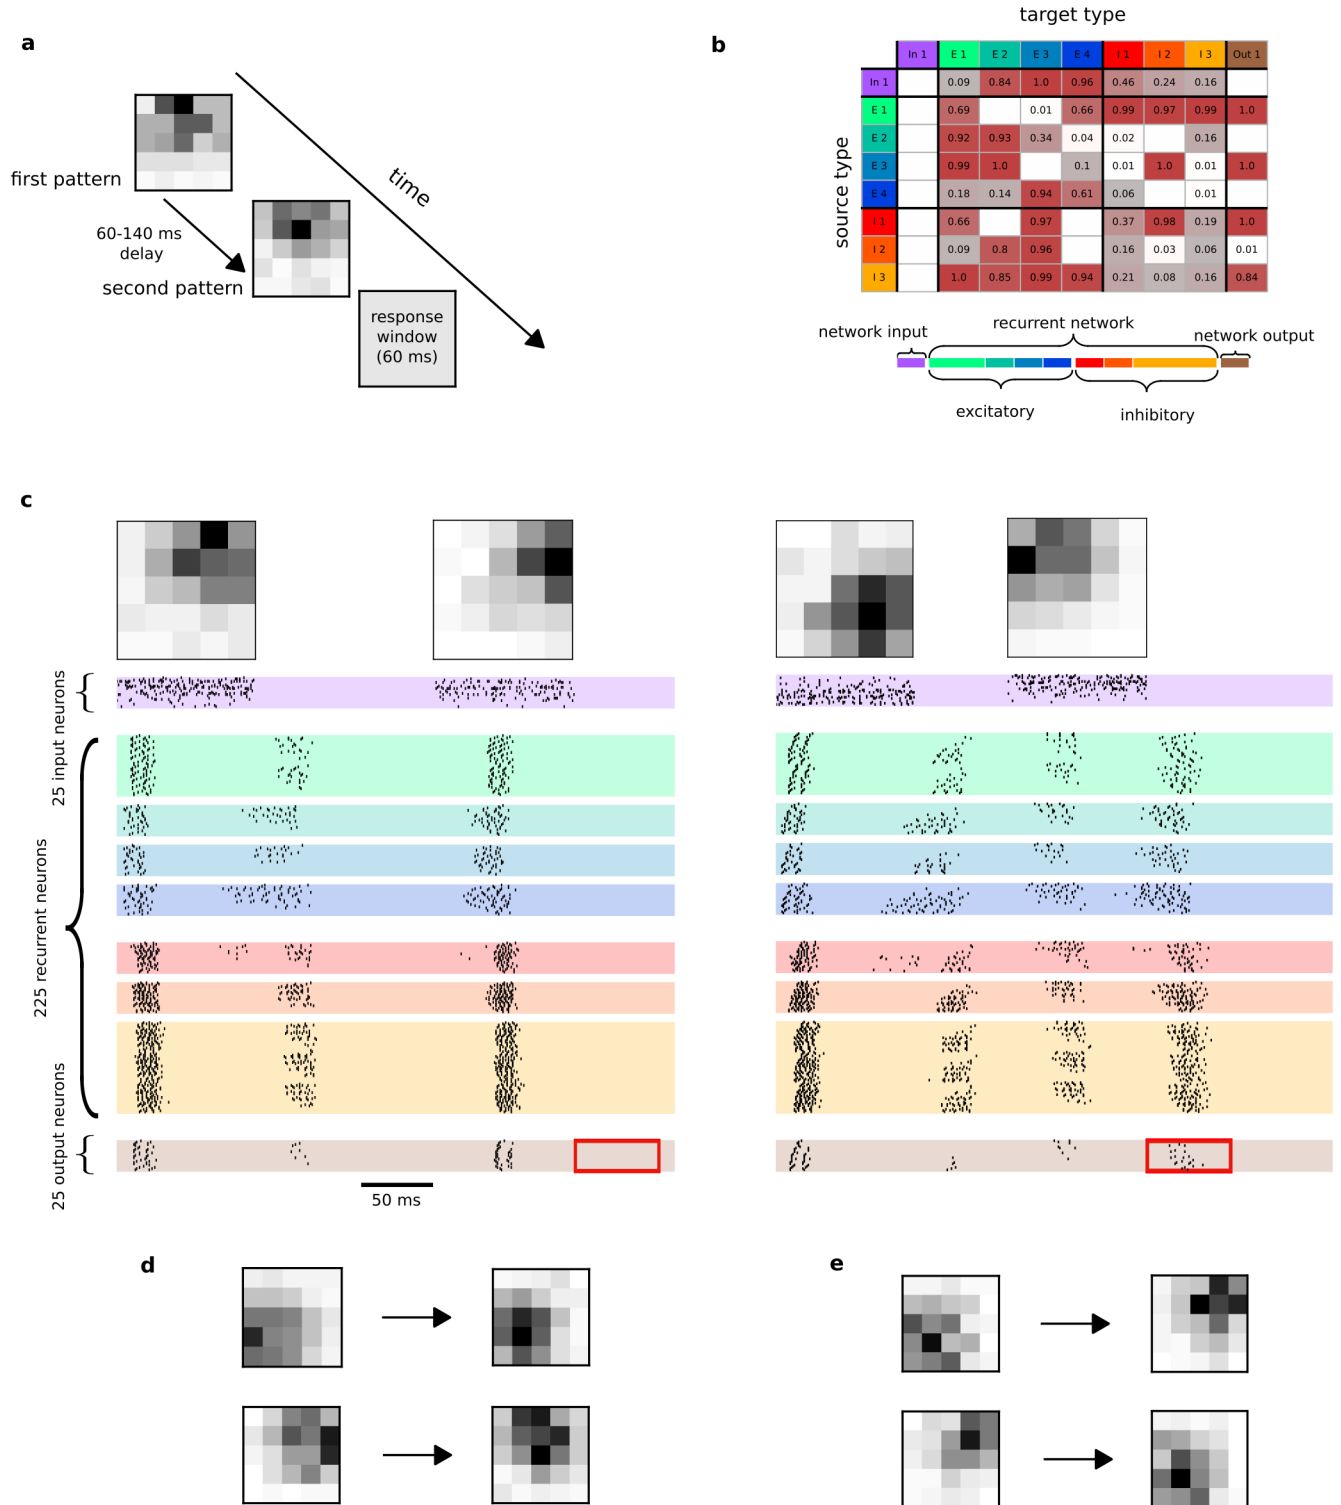



## 2 Results

**Figure 2:** Induction of a fundamental computational capability of laminar cortical microcircuits, to decide whether the sequentially presented 2D network inputs are similar, through network structure, i.e., through a probabilistic skeleton. **a** Temporal structure of the task. **b** A probabilistic skeleton that induces high RSNN performance on this task. **c** Network inputs and firing activity of an RSNN sample from this probabilistic skeleton for two trials, with varying delay between the two input patterns. In the first trial the two patterns are correctly judged by the RSNN to be similar, indicated by withholding of firing of output neurons (shown at the bottom) during the response window (indicated by red frame). In the second trial the two input patterns were correctly judged by the network to be dissimilar. Note that information about the first pattern had to be retained within the network until the second pattern arrived. This working memory aspect was nontrivial because each pattern consisted of 25 gray values. Persistent firing of neurons of type E1 emerged as a mechanism for that. **d** Two further correctly classified samples of matching input patterns of activity. The delay between the first pair was 62ms while the delay between the second pair was 122ms. **e** Two additional correctly classified samples for non-matching input patterns. The delay between the first pair was 64ms and the delay between the second pair was 133 ms.

181

182

### 183 2.3 Innate recognition of particular stimuli.

184 We know that numerous species have innate capabilities to recognize particular stimuli,  
185 such as odors and/or views of poisonous food and predators. Since such stimuli arrive in  
186 the brain in the form of specific spatio-temporal spike patterns, we need to understand  
187 how the genetic code can install in RSNNs the capability to recognize specific spatio-  
188 temporal patterns, such as those depicted in Fig. 3a. We show that templates for any  
189 such patterns can be encoded in features of RSNN structures that are under genetic  
190 control. We fixed two randomly generated spatio-temporal spike pattern templates, and  
191 generated by adding, deleting, and shifting spikes noisy variations of these templates as  
192 inputs of class 1 and 2. We also created a class 3 of distractor patterns that were not  
193 similar to any of the two frozen template patterns but used the same firing rates as these.  
194 Three output neuron types were selected that were supposed the class membership of  
195 patterns from any of these 3 classes of spatio-temporal spike patterns. A probabilistic  
196 skeleton with 9 types of neurons (besides input- and output neuron types) with altogether  
197 157 parameters (see Fig. 3b) is capable of achieving 91% accuracy on this task. A sample  
198 run of an RSNN sample from this skeleton, consisting of 144 neurons, for a pattern of  
199 class 1 is shown in Fig. 3c.

200 One may wonder whether also the capability to distinguish purely temporal patterns  
201 can be induced through the structure of RSNNs. We used as test inputs two waves of  
202 input spikes with temporal distances from 1 to 200ms, where the task is to classify in  
203 which of the four time bins of 50ms each the second spike wave arrived. A probabilistic  
204 skeleton with just 10 neuron types (besides input and output neuron types) is capable  
205 of achieving an accuracy of 97% on this task. A typical spike raster of an RSNN sample  
206 is shown in Fig. 3d. One sees that temporal distances between the two waves of input

## 2 Results

207 spikes and the decision time are bridged by persistent activity in specific recurrent neuron  
208 types. Further spike rasters can be found in Fig. S6, S7 and S8. Altogether the results  
209 of this section demonstrate that also all-important capability of RSNNs to recognize and  
210 compute with temporal differences between spikes can be engraved into them through  
211 their structure.

## 2 Results

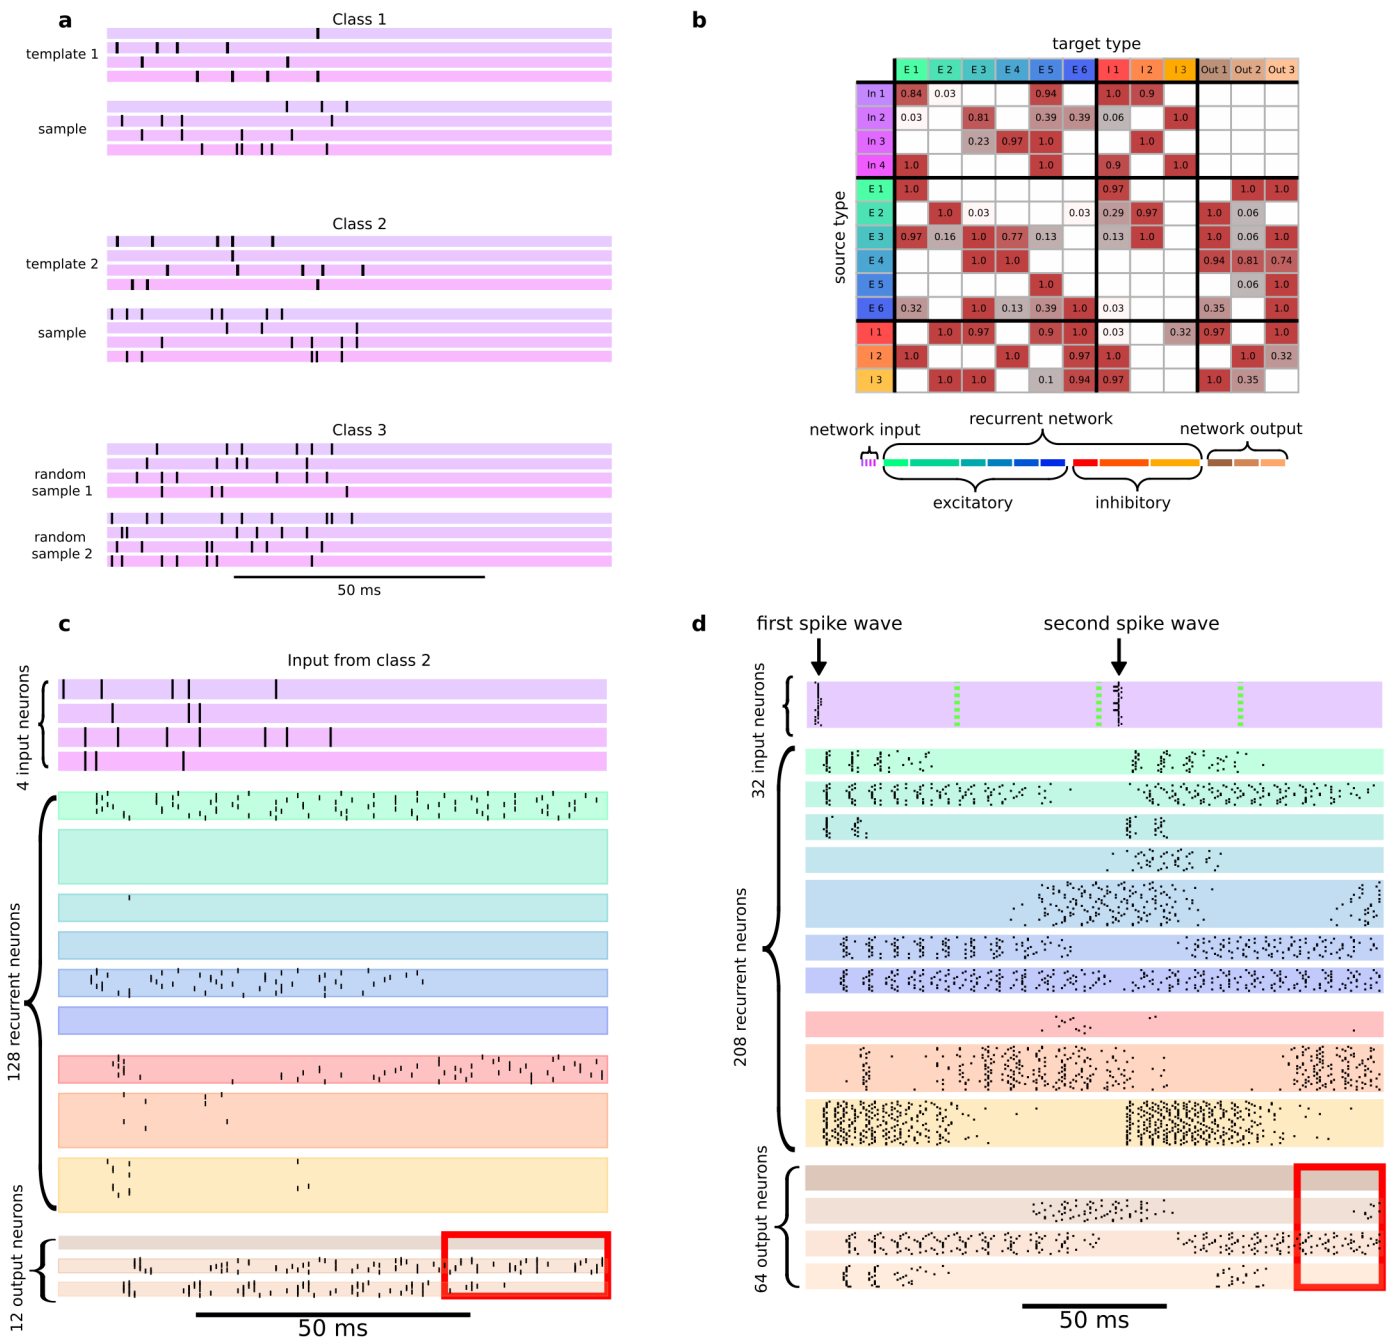

**Figure 3: Innate spike pattern classification capability.** **a** Two samples from each of the three classes of spike input patterns. The first two classes consist of variations of specific but arbitrarily chosen spike patterns, the third class consists of distractor spike patterns with the same firing rates. **b** Optimized probabilistic skeleton for this task. **c** Firing activity is shown for all neurons of RSNN samples with 144 neurons, in sample trials for spike inputs from class 2. The 30 ms time window during which the network decision is expected is indicated by the red frame at the bottom of the spike rasters. **d** Firing activity on the temporal pattern classification task, where the model tries to classify in which of the four time bins (50ms each) the second spike wave has arrived.

## 2 Results

212 The time scale of this task is in the range of behavioral responses, but a clever network  
213 organization is needed in order to enable a network of standard neuron and synapse  
214 models to discern and classify such fairly large time differences up to 200ms, and to  
215 produce the decision at a specific time after the onset of a trial, without an external  
216 clock or prompt.

### 217 **2.4 A probabilistic skeleton can endow neural networks with innate motor** 218 **control capability.**

219 Innate rudimentary motor control capability, for example, to stand up and walk right after  
220 birth, is essential for survival in many species. In contrast to the previously discussed  
221 computing tasks, biological motor control requires a transformation of multiple spike-  
222 input streams -that represent sensory inputs and feedback- into multiple time-varying  
223 spike output streams that control muscles in a closed loop, hence in real-time. We chose  
224 a standard benchmark task for motor control: Enabling a quadruped ("ant") to walk by  
225 controlling the 8 joints of its 4 legs through a suitable stream of torques. The RSNN  
226 controller received 9 spike input streams that encoded -with a delay of 60 ms to make  
227 the task more challenging and biologically realistic- through population coding 9 dy-  
228 namically varying variables: The angles of the 8 joints as well as the vertical position of  
229 the torso, see Fig. 4a. Further information about population coding can be found in the  
230 Suppl. in section 1.9 and in Fig. S5. We found that a probabilistic skeleton with just  
231 15 types of neurons in the recurrent network, specified by 635 parameters, see Fig. 4b, is  
232 able to encode this motor control capability. We refer to [movie of the ant locomotion](#)<sup>1</sup> for  
233 the resulting locomotion of the quadruped when its joints were controlled by an RSNN  
234 sample from this probabilistic skeleton. One can see in the input/output sample shown  
235 in Fig. 4d that the computational transformation which this task requires is quite com-  
236 plex. A sample spike raster of this RSNN in Fig. 4c shows that the population coding  
237 of the continuous-valued input variables induced a rather complex spatial dynamics of  
238 firing activity in most of the neuron types.

239 We employed RSNN samples from the probabilistic skeleton whose recurrent network  
240 consisted of 250 neurons. Direct tuning of their synaptic weights for this control task  
241 would result in a 114, 500 dimensional encoding of the control algorithm. The compressed  
242 encoding of the control strategy into just 635 parameters enhanced, as expected, the  
243 robustness of the RSNN controller: After randomly deleting 30% of the recurrent and  
244 output neurons of the RSNN, it was still able to control the ant locomotion, although the  
245 ant was walking somewhat slower, see ([Movie of ant after 30% deletion](#))<sup>2</sup>. Altogether we  
246 have seen in this section that also demanding real-time computing capabilities in a closed  
247 loop with the environment, as required for locomotion, can be encoded in a relatively  
248 low-dimensional parameter space and induced in RSNNs through their structure.

---

<sup>1</sup><https://cloud.tugraz.at/index.php/s/iXDS06Q7HDmDyX6>

<sup>2</sup><https://cloud.tugraz.at/index.php/s/WpyRncz62p9PnTc>

## 2 Results

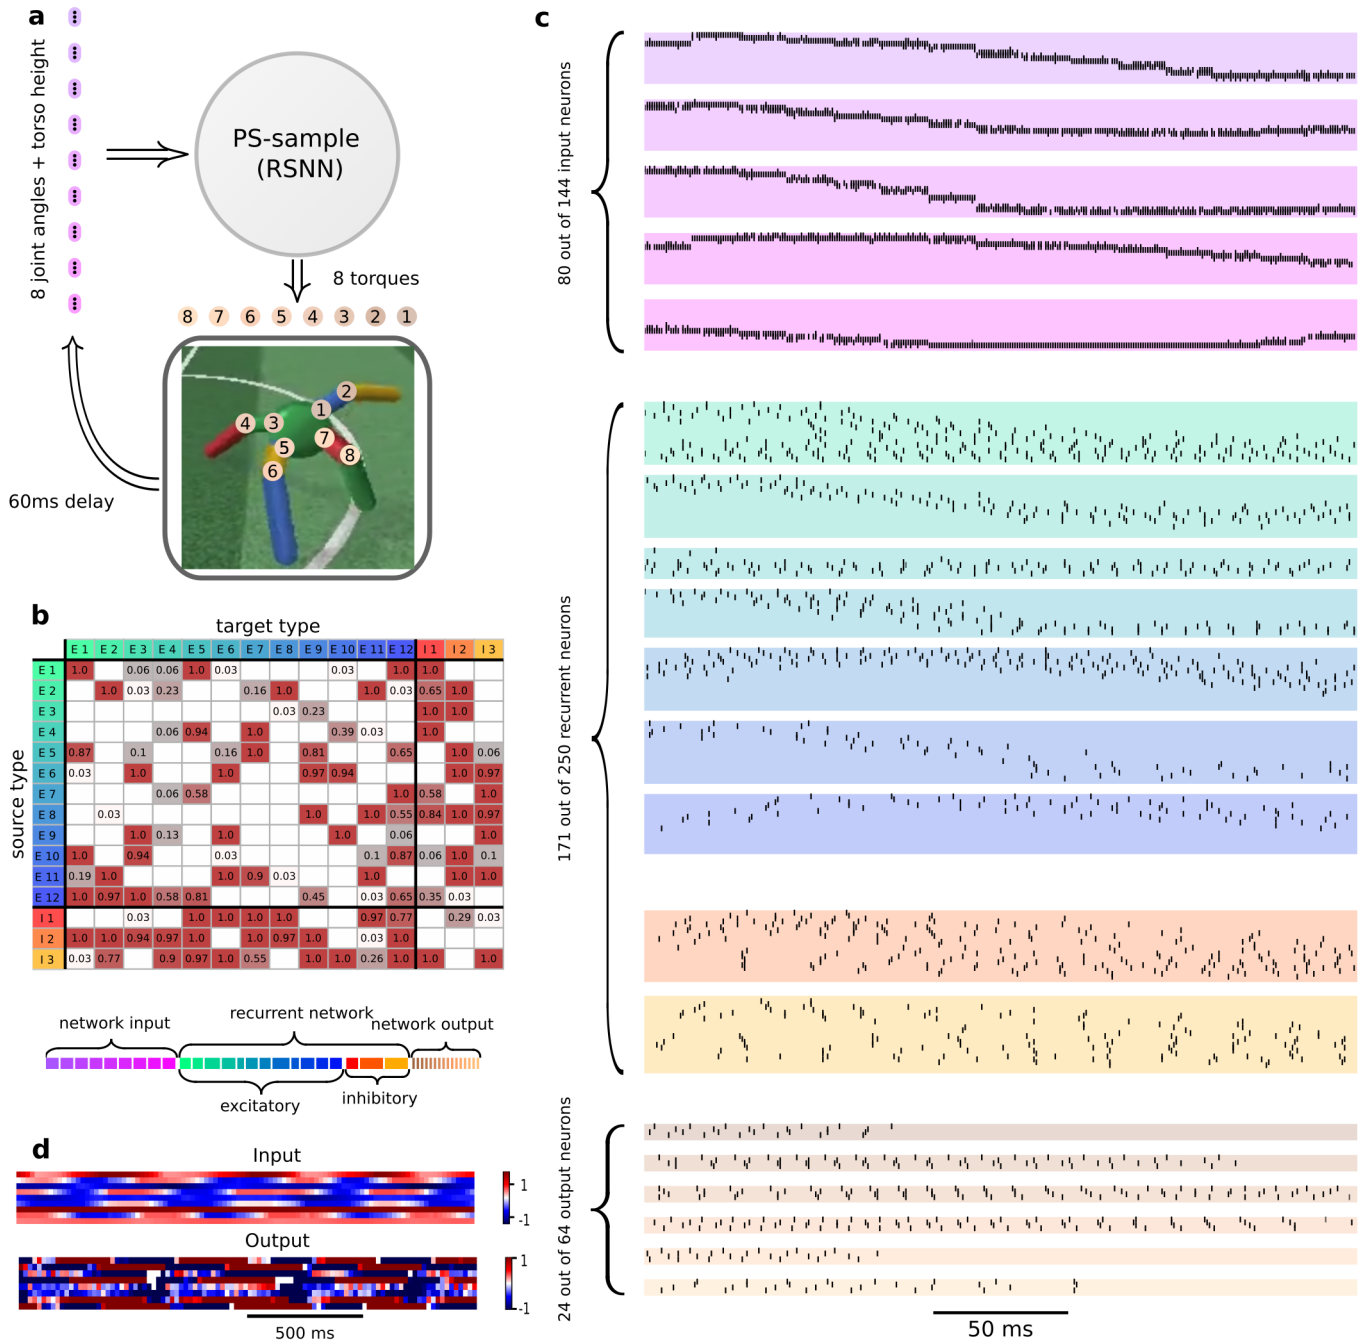

**Figure 4: Example for innate motor control capability through a probabilistic skeleton. a** System architecture, indicating network inputs and outputs, as well as the 8 joints that are controlled by the RSNN outputs. **b** Probabilistic skeleton for solving this motor control task (base connection probabilities for its numerous input- and output neuron types are shown in the Suppl., Fig S9) **c** Spike raster of an RSNN sample with 458 neurons drawn from this probabilistic skeleton. Population coding of the 9 continuous-valued input variables induced spatially structured firing activity in most of the neuron types. **d** Sample dynamics of input and output variables of the RSNN controller on a larger time scale.

## 2 Results

### 249 2.5 Principles of structure-induced network function.

**a Role of different numbers of neuron types**

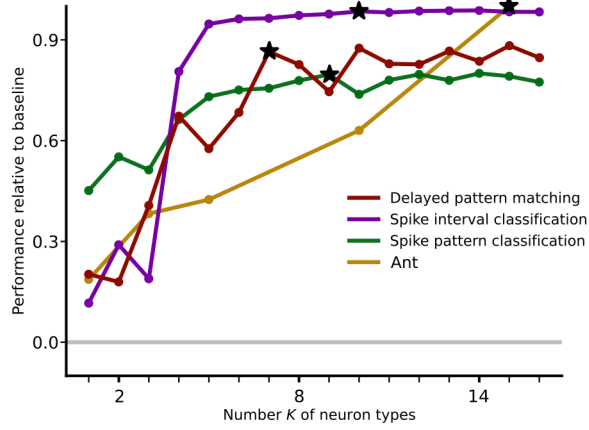

**b Perturbation of synaptic connection strengths**

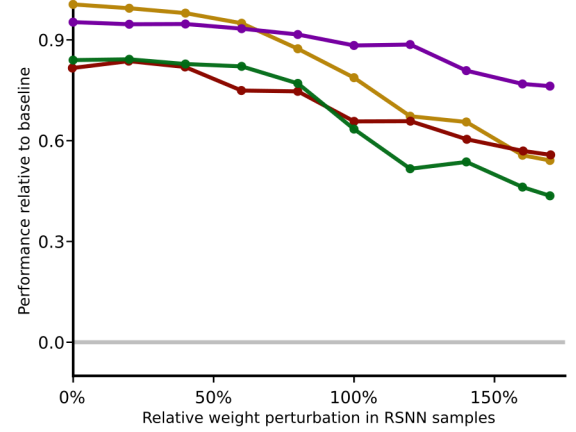

**c**

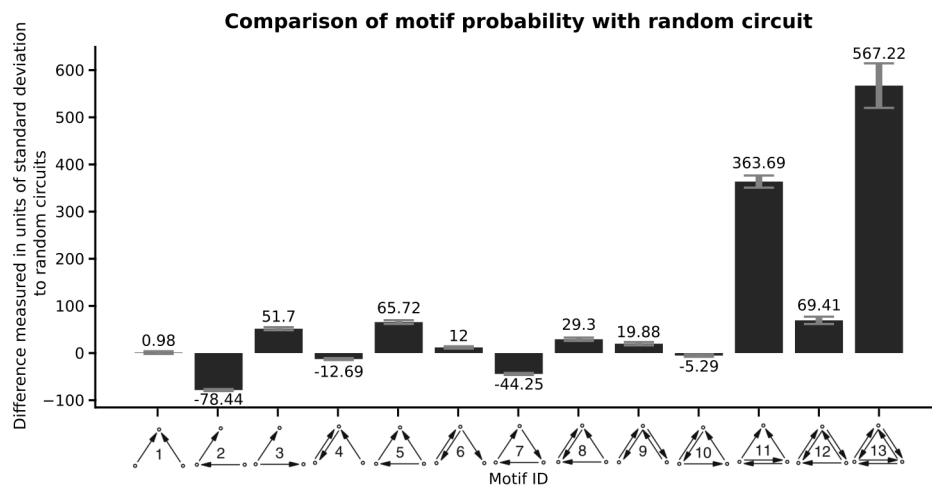

## 2 Results

**Figure 5: Empirical results underpinning Principles 1.- 3. a** Performance achieved by optimizing probabilistic skeletons with different numbers of recurrent neuron types. One sees a qualitative jump in computational performance when substantially more than 2 neuron types are considered. Black stars mark the numbers of neuron types of the probabilistic skeletons that were discussed for each task in preceding sections. Performance of RSNN was measured relative to random guessing as a common baseline for the tasks considered in sections 2.2 and 2.3, see Methods for details. **b** The computational performance of the RSNNs degrades gracefully when the strengths of synaptic connections, defined by the number of synaptic connections between two neurons, is randomly perturbed. **c** Comparison of the frequency of three neuron network motifs occurrence in a generic RSNN sampled from a probabilistic skeleton (the one from Fig. 4) and in a randomly connected graph with the same number of nodes and directed edges.

250

251

**Principle 1: A qualitative jump in computational performance of RSNN-samples occurs for many tasks when substantially more than 2 types of neurons are allowed.**

252

253

254

255

256

257

258

259

260

261

262

263

264

265

266

267

268

269

270

271

272

273

274

275

276

277

278

279

280

281

Fig. 5a for the tasks considered in sections 2.2 and 2.3. Also the probabilistic skeleton that controls locomotion of a quadruped (section 2.4) requires substantially more than 2 neuron types.

**Principle 2: Structure-induced network function is inherently robust to noise in synaptic strength.** Different strengths of synaptic connections arise in a RSNN generated by a probabilistic skeleton from multiple synaptic connections between two neurons. One sees that the network performance is quite robust to random perturbations of these synaptic strengths, as can be seen in Fig. 5b. This may explain why the performance of the RSNNs in the neocortex is little affected by continuously ongoing spine motility (Yasumatsu et al., 2008; Holtmaat and Svoboda, 2009)

**Principle 3: Probabilistic skeletons with an exponential decay of connection probabilities generate RSNNs whose number of synapses and total wire length grow just linearly with the number of neurons, and which have more strongly interconnected clusters of neurons than randomly connected graphs.**

The over-expression of strongly interconnected network motifs in RSNNs that are sampled from a probabilistic skeleton arises from the fact that the majority of synaptically connected neurons in such an RSNN have small distance. This strongly increases the chance of having also a synaptic connection in the opposite direction, and also favors the emergence of strongly interconnected clusters of neurons (see Fig. 5c for a sample). This is consistent with experimental data on the connectivity structure of neural networks in the cortex, where one finds a similar over-expression of strongly interconnected groups of neurons Song et al., 2005 and Perin, Berger, and Markram, 2011.

We refer to Suppl. sections 1.7 and 1.8 for concrete estimates of the expected number of synapses and wire length per neuron in RSNNs that are sampled from a probabilistic skeleton.

## 2 Results

282 **Principle 4: Activity patterns and computations in network samples from probabilistic**  
283 **skeletons can be arbitrarily complex.** Any cellular automaton, in fact more powerful  
284 versions where cells can have connections not only to the immediately adjacent cells but  
285 to a larger neighborhood of cells, arise as special cases of networks that can be gener-  
286 ated from a probabilistic skeleton. This is demonstrated in Fig. 6 for a particularly  
287 well-known cellular automaton, the Game-of-Life. It has attracted substantial interest  
288 because it can emulate any Turing machine, and hence any digital algorithm (Soare,  
289 2016). Each cell of this cellular automaton can assume two states: Dead or alive. It is  
290 alive at some time step if and only if either exactly 3 of its 8 neighbors in a 2D grid (one  
291 counts here also neighbors that just share a corner) were alive at the preceding time  
292 step, or if the cell itself and exactly 2 of its neighbors were alive at the preceding time  
293 step. In the RSNN that arises from the probabilistic skeleton with 5 neuron types shown  
294 in Fig. 6a, a neuron of type E1 indicates at every second time step through firing or  
295 not firing whether the cell of the cellular automaton that is induced by the probabilistic  
296 skeleton in each mini-column (Fig. 6b) is dead or alive. Fig. 6d shows an example of a  
297 wandering activity pattern that typically arises in this cellular automaton. In fact, also  
298 very complex periodic and transient activity patterns, reminiscent of dynamic activity  
299 patterns in the neocortex (see e.g. Han, Caporale, and Dan, 2008), are known to arise in  
300 this particular cellular automaton (Rendell, 2011) for a suitable external network input  
301 at the during step 1.



## 2 Results

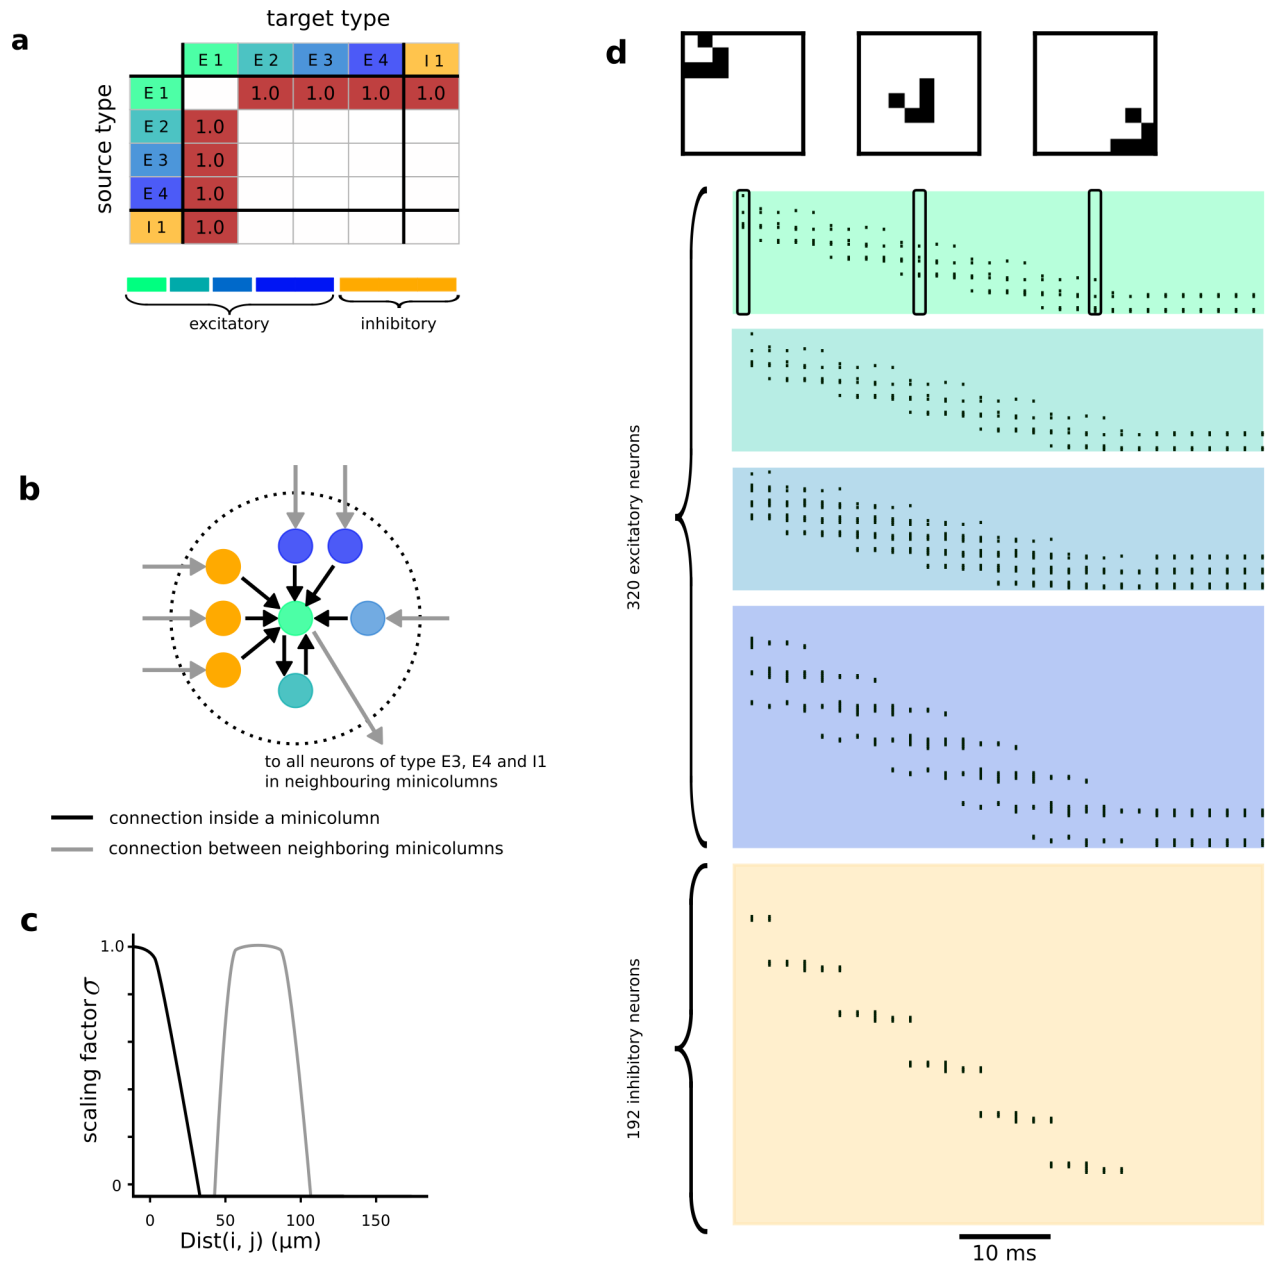

### 3 Discussion

**Figure 6: Generation of a spike-based cellular automaton, the Game-of-Life, through a probabilistic skeleton.** **a** A probabilistic skeleton that generates the Game-of-Life (only probability values 1 and 0 are needed). **b** Resulting network of spiking neurons within a mini-column. **c** Distance-dependent scaling function for this probabilistic skeleton. The gray curve scales connections from neurons of type E1 to neurons of types E3, E4, I1, the black curve all other connections. **d** Sample traveling activity patterns in an RSNN sample (the patterns shown at the top are encoded by the firing of E1 neurons), and the spiking activity of all neurons in this implementation of the Game-of-Life in a RSNN.

302

303

304 Obviously, any finite automaton can be induced in the same way by a special case of  
305 a probabilistic skeleton where all connection probabilities have values 0 or 1. Further-  
306 more, also enhanced versions of cellular automata can be induced through a probabilistic  
307 skeleton if one allows distance-dependent scaling of connection probabilities that covers  
308 a wider range than the simple one needed for the Game-of-Life (Fig. 6c). In particu-  
309 lar, also cellular automata that are able to carry out image segmentation through an  
310 efficient parallel computation (Sandler et al., 2020), or which can classify external input  
311 patterns in a highly parallel manner through intercommunication between cells (Ran-  
312 dazzo et al., 2020), can be induced by probabilistic skeletons. Probabilistic skeletons  
313 whose connection probabilities are not constrained to the extreme values 0 and 1 are  
314 able to induce stochastic versions of such cellular automata that may have additional  
315 computational properties such as the capability to solve constraint satisfaction problems,  
316 see e.g. Habenschuss, Jonke, and Maass, 2013.

### 317 3 Discussion

318 We have addressed two key open problems in theoretical neuroscience: How the genetic  
319 code is able to induce complex innate computing capabilities in neural networks of the  
320 brain with a small number of parameters, and why the brain employs a fair number  
321 of genetically different neuron types. We have shown that distance-modulated neuron-  
322 type specific connection probabilities between neurons, as found in experimental data  
323 on the anatomy of cortical microcircuits Billeh et al., 2020, suffice to induce innate  
324 complex computational functions in networks of spiking neurons, provided there exists  
325 a substantial number of different neuron types. We have demonstrated that this holds  
326 even for the simplest case where neurons of different (genetic) types have the same interal  
327 dynamics. The concept of a probabilistic skeleton turned out to be useful for providing  
328 this insight, since it encapsulates a known fragment of the programming language which  
329 is available to the genetic code for determining the structure of neural circuits. We  
330 have shown that probabilistic skeletons are able to induce generic 2D computational  
331 operations in cortical microcircuits through their structure. They also allowed us to show  
332 that innate pattern recognition capabilities, such as recognition of odors from poisonous  
333 food, and innate motor control capabilities can be induced through genetically encoded  
334 structure of neural circuits. Surprisingly, also fundamental capabilities to compute with  
335 spiking neurons on temporal patterns can be induced through the network structure.

### 3 Discussion

336 Probabilistic skeletons suggest a particular method for meeting the challenge of Zador,  
337 2019: Understanding the functional impact of the "genomic bottleneck", i.e., of the fact  
338 that the number of bits which the genome uses for encoding neural networks in the  
339 brain is really small in comparison with the number of their synapses. A quite different  
340 response to this challenge has been addressed by (Koulakov, Shuvaev, and Zador, 2021)  
341 on a more abstract level, based on the assumption that the existence of a synaptic con-  
342 nection between two neurons can be determined by linear operations on binary codes for  
343 these neurons. The model of (Barabási and Beynon, 2021) is less abstract, and assumes  
344 instead that connections between neurons can be formulated as compatibility rules in  
345 terms of transcription factors. Implications of the genomic bottleneck on the functional  
346 level was demonstrated in these approaches in terms of enhanced generalization capabil-  
347 ities of trained feedforward artificial neural networks.

348 Our analyses suggests that one should view the neocortex not just as a special case  
349 of a deep neural network (DNNs) that acquires its sophisticated computing capabilities,  
350 starting with a randomly structured configuration, through supervised gradient descent  
351 learning, like DNNs in AI. Rather the cortex can better be captured by computational  
352 models that merge aspects of DNNs with aspects of cellular automata (CA), a common  
353 model for explaining the emergence of function through structure in 2D arrays of repeat-  
354 ing stereotypical "cells". We have shown that having a fair number of different neuron  
355 types enables the genetic code to encode through connection probabilities between dif-  
356 ferent neuron types the computational function of finite automata into neural circuits.  
357 Cellular automata are therefore special cases of 2D sheets of neural circuits that can be  
358 induced through a probabilistic skeleton, and therefore in principle through the genetic  
359 code. Hence probabilistic skeletons, and more generally the principle to encode neural  
360 circuits through connection probabilities between different types of neurons, creates a  
361 link between RSNNs and cellular automata as dual paradigms for the organization of  
362 computational function in the neocortex. Since RSNNs that are generated by a prob-  
363 abilistic skeleton are, unlike cellular automata, not constrained to have only synaptic  
364 connections between neurons within the same or in neighboring "cells", they represent  
365 more powerful computational models, especially for fast parallel computation. It should  
366 also be noted here that according to experimental data there are also numerous long-  
367 range connections in the neocortex, especially between different cortical areas, that are  
368 likely to give rise to advanced versions of probabilistic skeletons and RSNN samples with  
369 additional innate computing and fast learning capabilities.

370 Neural networks that are derived as samples of a probabilistic skeletons differ in an-  
371 other aspect from commonly considered network architectures: Their number of synapses  
372 and total wire length grows just linearly with the number of neurons. This property is  
373 obviously essential for any physical implementation of neural network connections, both  
374 in brains and in neuromorphic hardware. In addition, their resilience to weight pertur-  
375 bations supports an implementation of synapses through memristors. Another possible  
376 technological application of probabilistic skeletons arises in the domain of organoids  
377 (Bhaduri et al., 2020), where it is highly desirable to induce computational function  
378 in brain-like organoids through their genetically controlled structure, without invoking  
379 synaptic plasticity. Their style of indirect encoding by using different neuron types is

## 4 Methods

also likely to enhance already existing indirect coding approaches in the area of neuroevolution (Ha, A. Dai, and Le, 2016; Stanley et al., 2019). On a more general level, the result that network structure acquires a substantially stronger impact on network function if the network units consist of a fair number of different types suggests a new research direction in network science.

### 4 Methods

#### Neuron types

There are 3 kinds of neuron types: input types, recurrent types, and output types. The neurons from these three categories are referred to as input neurons, recurrent neurons, and output neurons.

Input neurons provide external inputs in the form of spike trains. They have no internal states, and there are no recurrent connections from recurrent neurons or output neurons back to the input neurons. The output neurons receive their input from the recurrent neurons (see Fig. 1e).

Recurrent neurons can have connections from input neurons and other recurrent neurons. Each recurrent neuron can only give rise to excitatory neurons or only of inhibitory neurons. Note that input or output types only consist of excitatory neurons.

#### Neuron and synapse models

Recurrent and output neurons are modelled as discrete-time versions of standard Leaky-Integrate-and-Fire (LIF) neuron models, More precisely of the GLIF<sub>1</sub> model from (Teeter et al., 2018). The definition of the continuous neuron model, on which the discrete-time model is based on, can be found in the Suppl. in section 1.3. Control experiments with the GLIF<sub>3</sub> model from (Billeh et al., 2020) produced qualitatively similar results.

For the discrete time version of neuron  $j \in \{1, \dots, N\}$  of type  $J$  the membrane potential is denoted by  $V_j$  and the input current by  $I_j$ . We assume that currents are constant on small intervals  $[t, t + \delta t]$ , which have been set to a length of 1 ms. The neural dynamics of the model in discrete time can then be given as

$$V_j(t + \delta t) = \begin{cases} \alpha V_j(t) + (1 - \alpha)(E_L + \frac{1}{C_m} I_j(t)) & \text{if } z_j(t) = 0 \\ V_r & \text{else} \end{cases} \quad (1)$$

(2)

where  $\alpha = \exp(-\frac{\delta t}{\tau})$  and

$$z_j(t) = H(V_j(t) - v_{th}(t)) \quad (3)$$

with the Heaviside function  $H(x) = \begin{cases} 0 & x < 0 \\ 1 & \text{else} \end{cases}$ . Here  $\tau \in \mathbb{R}$  is the membrane time constant,  $E_L \in \mathbb{R}$  is the resting potential,  $C_m \in \mathbb{R}$  is the membrane conductance and

## 4 Methods

405  $v_{th}$  is the threshold voltage. After spiking the neuron enters a refractory period, lasting  
406  $t_{ref} > 0$ , in which  $z_j(t)$  is fixed to zero.

The previously defined neuron model use the following set of parameters:

$$\mathcal{H} = \{C_m^J, \tau^J, V_r^J, v_{th}^J, t_{ref}^J \mid J = 1, \dots, K\}.$$

407 The values for  $\{C_m^J, \tau^J, V_r^J, v_{th}^J, t_{ref}^J \mid J = 1, \dots, K\}$  are taken from (Billeh et al., 2020),  
408 and the raw data is available in (*V1 Network Models from the Allen Institute* n.d.). A  
409 good overview of these neuron types has been made available online in the database of the  
410 Allen institute. Detailed biological and modelling data for the prototype of the excitatory  
411 neuron can be found at [Excitatory neuron](#)<sup>3</sup> and the prototype for the inhibitory neuron  
412 at [Inhibitory neuron](#)<sup>4</sup>. We have seen no evidence that the exact values of the GLIF<sub>1</sub>  
413 parameters are essential for the results reported in this paper.

414 The same synapse model as in (Billeh et al., 2020) has been used. Additional infor-  
415 mation about the synapse model as well as a mathematically more precise description  
416 can be found in the Suppl. in section 1.4 and in Fig. S4.

### 417 **Details to the definition of a probabilistic skeleton**

418 A probabilistic skeleton consists of

- 419 (i) A natural number  $K$  (the number of neuron types in the model; we have set  $K = 6$   
420 in the illustrations of the model in Fig. 1c).
- 421 (ii) Base connection probabilities  $p_{I \rightarrow J}$  for neurons of type  $I$  to neurons of type  $J$ ,  
422 for the case that they are located within the same minicolumn (see upper part of  
423 Fig. 1c for a sample table of such base connection probabilities).
- 424 (iii) The prevalence  $p_I$  of each neuron type  $I$ , i.e., a number representing the fraction  
425 of neurons belonging to type  $I$  in a generic minicolumn, see the bottom plot of  
426 Fig. 1c. Further details can be found in the Suppl., section 1.5.
- 427 (iv) The common weight  $w_{in}$  of all synapses from input neurons, as well as the common  
428 weight  $w_E$  of all synapses from excitatory and the common weight  $w_I$  of all synapses  
429 from inhibitory neurons in the recurrent network.
- 430 (v) A scaling parameter  $\sigma$  that controls the decay of connection probabilities with the  
431 horizontal distance between somata.

432 A probabilistic skeleton is a generative model, which defines a distribution over neural  
433 networks of different sizes and with different synaptic connections that share common  
434 architectural features.

435 One samples a neural network from a probabilistic skeleton according to the following  
436 rules:

---

<sup>3</sup><https://celltypes.brain-map.org/experiment/electrophysiology/501848315>

<sup>4</sup><https://celltypes.brain-map.org/experiment/electrophysiology/313862167>

## 4 Methods

- 437 1. Pick a number  $n_{mcol}$  of minicolumns and a number  $M \geq K$  of neurons per mini-  
438 column. This determines the number of neurons  $N = n_{mcol} \cdot M$  in the sample  
439 network.
- 440 2. Draw  $S$  times for any pair  $(i, j)$  of neurons with  $i$  of type  $I$  and  $j$  of type  $J$  from  
441 the binomial distribution with probability:

$$\mathbb{P}[\text{Synapse from } i \text{ to } j] = p_{I \rightarrow J} e^{-\frac{\text{Dist}(i,j)^2}{\sigma^2}} . \quad (4)$$

442 This yields the number  $m_{ij}$  of synaptic connections from  $i$  to  $j$ .

443 The functional form of the dependence of connection probabilities on  $\text{Dist}(i, j)$  ap-  
444 proximates the corresponding data from (Billeh et al., 2020), see panels b and d in  
445 Fig. 1. We have set  $S = 8$  in all our experiments, thereby allowing up to 8 synaptic con-  
446 nections between any pair of neurons. According to Fig. 7A in (Markram et al., 2015)  
447 most synaptically connected neurons do in fact have multiple synaptic connections. The  
448 effective strength (weight) of a synaptic connection from neuron  $i$  to neuron  $j$  is then  
449 the product of the general scaling parameter  $w_{in}$ ,  $w_E$ , or  $w_I$ , that depends on the type  
450 of neuron  $i$ , and the number  $m_{ij}$  of synaptic connections from  $i$  to  $j$  that results from  
451 drawing  $S = 8$  times from the distribution given in equ. (4).

### 452 Optimization method

453 Probabilistic skeletons were optimized for specific computing tasks with the Separable  
454 Natural Evolution Strategy (Separable NES), which had been introduced in (Schaul,  
455 Glasmachers, and Schmidhuber, 2011). The algorithm is given below in pseudo code. For  
456 the optimization of the  $d$ -dimensional vector  $\theta$  of parameters of the probabilistic skeleton  
457 the algorithm uses a Gaussian distribution in every dimension, with means  $\mu \in \mathbb{R}^d$  and  
458 variances  $\sigma \in \mathbb{R}^d$ . The basic idea is that one samples  $\lambda$  times from this distributions, then  
459 evaluates the fitness values of the so-called offsprings, i.e. the vectors  $\theta_j \sim \mathcal{N}(\mu, \mathbf{I}\sigma)$ , and  
460 finally adapts the Gaussian distributions to capture more of those parts of the parameter  
461 space where the fitness of the offsprings is higher. The fitness function  $F$  depends on the  
462 computational task for which the probabilistic skeleton is optimized. The mean values of  
463 the parameters are initialized by truncated normal random variables with mean zero and  
464 variance 1.0 and the variance values are initialized as ones. We found that choosing the  
465 learning rate for  $\mu$  as  $\eta_\mu = 1.0$  yields good results, which is consistent with the suggested  
466 value in (Wierstra et al., 2008) and (Salimans et al., 2017). The learning rate for  $\sigma$  was  
467 chosen as  $\eta_\sigma = 0.01$ . As suggested in (Salimans et al., 2017) mirrored sampling has been  
468 employed, see, e.g., (Brockhoff et al., 2010). That is, for every Gaussian noise vector  
469  $\mathbf{s} \in \mathbb{R}^d$  also the offspring, which results from using  $-\mathbf{s}$ , will be evaluated.

## 4 Methods

---

### Algorithm 1 Separable NES

---

**Require:**  $\lambda \in \mathbb{N}$ ,  $\boldsymbol{\mu} \in \mathbb{R}^d$ ,  $\boldsymbol{\sigma} \in \mathbb{R}^d$ ,  $\eta_\mu, \eta_\sigma, F$   
**Ensure:**  $\lambda \equiv 0 \pmod{2}$ ,  $\eta_\mu > 0$ ,  $\eta_\sigma > 0$

```

for epoch=1,...,N do
  for k=1,..., $\lambda/2$  do
    Init  $\mathbf{s} \in \mathbb{R}^{(\lambda,d)}$  as  $\mathbf{s}_k \sim \mathcal{N}(\mathbf{0}, \mathbf{I})$ ,  $\mathbf{s}_{(k+\lambda/2)} = -\mathbf{s}_k$ 
     $\boldsymbol{\theta}_k \leftarrow \boldsymbol{\mu} + \boldsymbol{\sigma} \odot \mathbf{s}_k$ 
    Compute Fitness  $F(\boldsymbol{\theta}_k)$ 
  end for
  Compute gradients
   $\nabla_{\boldsymbol{\mu}} \leftarrow \sum_{k=1}^{\lambda} F(\boldsymbol{\theta}_k) \mathbf{s}_k$ 
   $\nabla_{\boldsymbol{\sigma}} \leftarrow \sum_{k=1}^{\lambda} F(\boldsymbol{\theta}_k) (\mathbf{s}_k^T \mathbf{s}_k - 1)$ 
  Update parameters
   $\boldsymbol{\mu} \leftarrow \boldsymbol{\mu} + \eta_\mu \boldsymbol{\sigma} \nabla_{\boldsymbol{\mu}}$ 
   $\boldsymbol{\sigma} \leftarrow \boldsymbol{\sigma} \exp\left\{\frac{\eta_\sigma}{2} \nabla_{\boldsymbol{\sigma}}\right\}$ 
end for

```

---

For the optimization of the base connection probabilities  $p_{I \rightarrow J}$  one needs to make sure that they are always assigned values in  $[0, 1]$ . For that purpose real valued auxiliary parameters  $\kappa_{IJ} \in \mathbb{R}$  are optimized, from which the base connection probabilities are obtained by using the sigmoid function:

$$p_{I \rightarrow J} = \frac{1}{1 + e^{-\kappa_{IJ}}}. \quad (5)$$

470 The value of the number  $K$  of neuron types and of the scaling parameter  $\sigma$  from  
 471 equation (4) were optimized through a separate hyperparameter search.

## 4 Methods

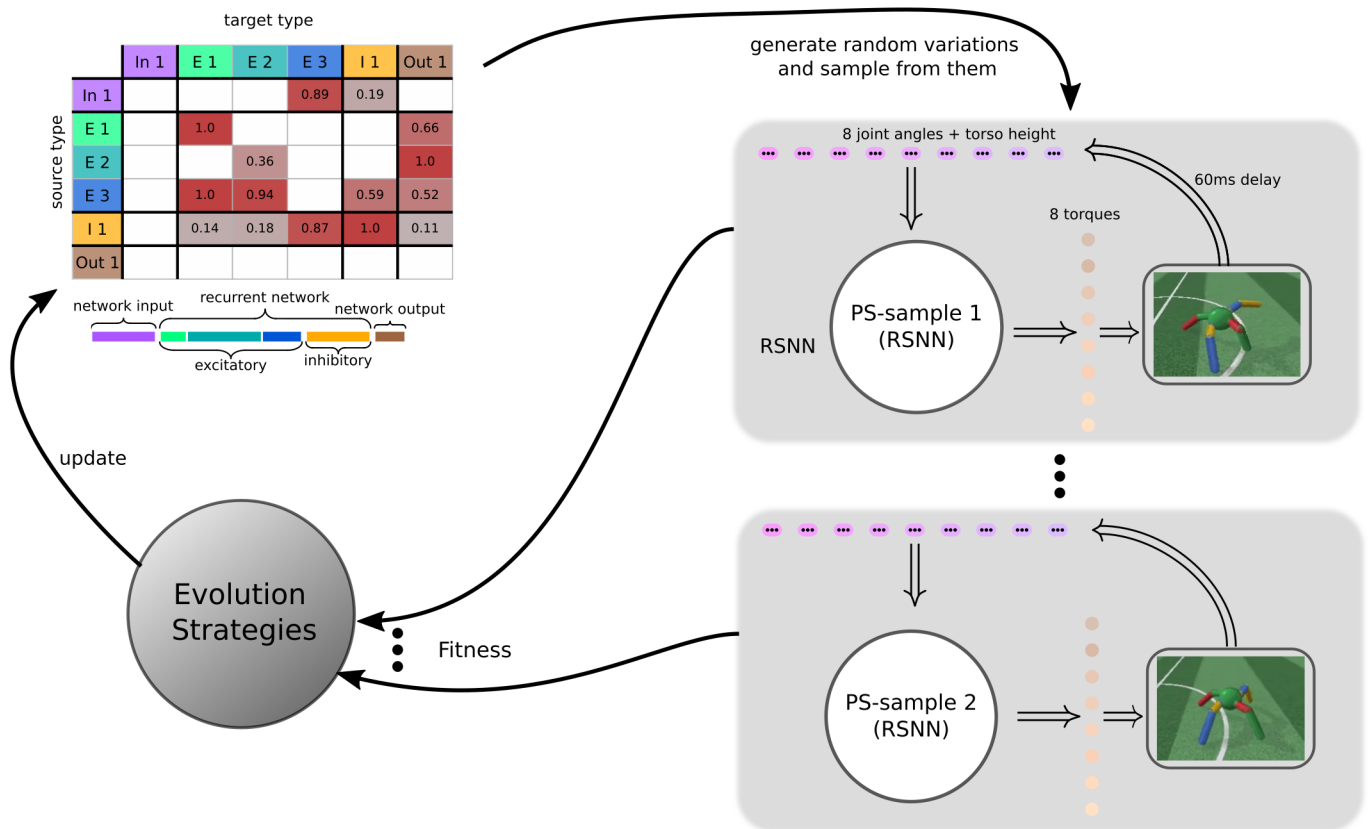

**Figure 7: Illustration of our algorithmic approach for optimizing a probabilistic skeleton for a computing task.** The motor control task of Fig. 4 is used as illustration. Several RSNNs are sampled from the current probabilistic skeleton, and their capability to solve the given task, i.e., their fitness, is measured. Evolution strategies modify the probabilistic skeleton based on these fitness values. Then the loop is iterated.

### 472 Experiments

#### 473 Details to the delayed pattern matching task

474 **Task description:** In this task two 2D patterns are presented to a RSNN with a variable  
 475 delay. The goal of the task is for the network to decide whether the two patterns are  
 476 similar or different. Similar in this context means that the patterns have been sampled  
 477 from the similar pattern probability distribution, while different would indicate that the  
 478 patterns originated from two different probability distributions.

479

#### 480 Input generation



## 4 Methods

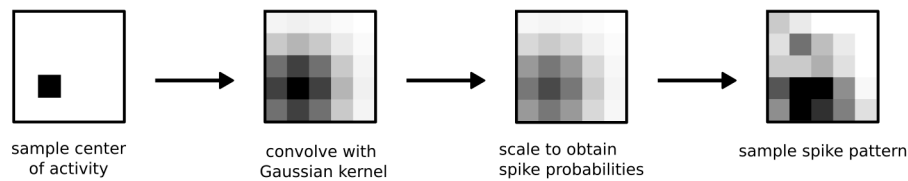

**Figure 8: Visualization of the input pattern generation process** In the first step a random center of activity is drawn uniformly on a 2D sheet. Subsequently, a convolution with a Gaussian kernel is applied and the resulting values are scaled and interpreted as firing probabilities. Lastly, these firing probabilities are associated to input neurons and used to sample a spike pattern.

481 The input generation process is visualized in Fig. 8. To generate a pattern probabil-  
482 ity distribution a random point with coordinates  $(m, n) \in \{2, \dots, \sqrt{n_{mcol} - 1}\}$  is drawn  
483 randomly. Subsequently, a value of 1 is assigned at the coordinates of this point, while  
484 all other points have a value of 0, as can be seen in the first part of Fig. 8. This point  
485 represents the center of activity. Next, the pattern is convolved with a 2D Gaussian  
486 kernel, and scaled to obtain firing probabilities, where the highest probability amounts  
487 to 0.2. These firing probabilities are associated with neurons of the input type and can  
488 be used to sample input patterns, where spikes are drawn independently for every mil-  
489 lisecond. Two pattern probability distributions are considered similar if the centers of  
490 activity have a distance of less than 2, while dissimilar pattern probability distributions  
491 have a greater distance between the centers of activity.

492

493 **Performance measure:** The performance measure for this task is the classification accu-  
494 racy.

495

496 **Fitness function:** As a fitness function cross-entropy was used. Furthermore rate regu-  
497 larization was employed to keep the RSNNs from moving to biologically unrealistic firing  
498 regimes.

499

500 **Details of probabilistic skeleton and its optimization process:** A decay constant of  
501  $\sigma = 80$  was used for this task. The scaling parameters were  $w_{in} = 8.66$ ,  $w_E = 17.6$   
502 and  $w_I = 8.22$ . The 275 neurons of the RSNN were arranged in  $n_{mcol} = 25$  minicolumns  
503 on a 5x5 grid, where  $M = 11$ . In every minicolumn there was one input and one out-  
504 put neuron. The probabilistic skeleton contains 74 parameters, whereas the full RSNN  
505 contains 61,875 synaptic weights.

506 **Details to computations on spike times.**

**Task description:** The goal is here to classify the temporal distance between two waves  
of input spikes. There is a fixed time interval of 200 ms, which is divided into four bins  
of 50 ms. For each class the first spike occurs at the beginning  $t = 0$  and the second

## 4 Methods

spike is uniformly drawn from the four bins, which results in four classes of input spike trains. The precise timing of the second spike is again uniformly sampled within the time interval of the chosen bin.

**Input:** The network receives as input a wave of spikes at the beginning of a 200ms long trial, and the second wave at any other time during the trial. For each input neuron some Gaussian noise with mean zero and variance 1 ms has been added to the spike times to avoid that all input neurons spike at the exact same time.

**Performance measure:** The percentage of correctly classified distances between the two waves of input spikes is used as a performance measure. The standard deviation of the performance on this and the subsequent tasks was obtained by averaging over the performance of 50 different RSNNs sampled from the same probabilistic skeleton evaluated on 100 inputs each.

**Fitness function:** Best optimization results are achieved when a different fitness measure than accuracy is used. To compute the fitness the softmax function was applied to the vector  $(r_1, r_2, r_3, r_4)^T$  of spike counts of the 4 output neuron types during the last 30ms of a trial to obtain the class probabilities  $(p_1, p_2, p_3, p_4)^T$ . To compute the fitness the target class  $y$  was first one-hot encoded to the target class vector  $\mathbf{y}$ , i.e. to a vector where all entries are 0 except the element at position  $y - 1$ , which has the value 1. An example of one-hot encoding can be found in the Suppl., section 1.6. The fitness function is given by the negative cross entropy loss. For a single example with one-hot-encoded target class  $\mathbf{y}$  the fitness is defined as:

$$F(\boldsymbol{\theta}) = \sum_{k=1}^4 y_k \log(p_k). \quad (6)$$

507

508

509 **Details of the probabilistic skeleton and its optimization process:** A decay constant  
510 of  $\sigma = 77.7$  was used for this task. The scaling parameters for synaptic strengths were  
511  $w_{in} = 14.6$ ,  $w_E = 15.49$ ,  $w_I = 6.92$ . The 304 neurons of RSNN samples during opti-  
512 mization were arranged in  $n_{mcol} = 16$  minicolumns on a 4x4 grid, where  $M = 19$ . In  
513 every minicolumn there are two input neurons and there is one output neuron per type.

514 During the optimization of the probabilistic skeleton the activity of output neurons  
515 was not only considered during the last 30ms. Instead, initially all spikes of output  
516 neurons were counted during the full 200ms of a trial. In the course of the optimization  
517 this period was gradually reduced to the last 30ms.

### 518 **Details to installing in RSNNs the capability to recognize specific spike** 519 **patterns**

520 **Generation of spike inputs:** Two clearly distinct ensembles of Poisson spike trains from  
521 4 neurons with a rate of 50 Hz were frozen as templates. Spike input patterns of classes

## 4 Methods

522 1 and 2 were generated by creating variations of these spike templates: For every input  
523 neuron two time steps from the first 50ms were chosen, and a new spike was inserted at  
524 them or the spike was deleted if there was a spike at this time step. Subsequently, the  
525 spike times of all spikes in the template were shifted by a random amount drawn from a  
526 Gaussian with mean zero and variance 0.5 ms and rounded to the nearest integer value.  
527 The third class consisted of random Poisson spike trains over 50ms with a rate of 50 Hz.

528

529 **Input:** The network received as input a spike pattern of 4 input neurons over 50ms  
530 from one of the three classes, drawn with uniform probability from the three classes.

531

532 **Performance Measure:** The same performance measure as for the preceding task was  
533 used.

534

535 **Fitness function:** A corresponding fitness function as for the preceding task was used.

536

537 **Details of the probabilistic skeleton and its optimization process** Parameters  $w_{in} = 14.38$ ,  
538  $w_E = 7.85$ ,  $w_I = 7.90$  and  $\sigma = 129.73$  were used. RSNN samples that were tested during  
539 the optimization of the probabilistic skeleton consisted of 148 neurons, which were ar-  
540 ranged in a 3x4 grid of  $n_{mcol} = 12$  minicolumns, each minicolumn consisting of  $M = 12$   
541 neurons. There was one input neuron in every corner of the grid, hence the corresponding  
542 columns had one neuron more than  $M$ .

### 543 **Details to innate motor control capabilities through probabilistic skeletons**

**Task description:** For the simulation of the environment (AntMuJoCoEnv-v0) the Py-  
Bullet physics engine (Coumans and Bai, 2016–2021) was used. The agent is a quadruped  
walker and is usually referred to as 'ant' in the literature. It consists of four legs with  
four joints, which are attached by another four joints to a torso, modelled as a sphere.  
The center of the sphere defines the location of the plant on a 2D plane. The goal  
of this task is to achieve a high movement speed over the whole trial period, while  
also avoiding to touch the ground. An episode is terminated if the center of its torso  
moves below a height of 0.2m, or if the maximum number of time steps has been reached.

**Spatial structure of RSNN samples** The population coding of continuous-valued input  
variables induced a prominent 1D dynamics in populations of input neurons, and there  
seems to be no natural way to map these 2D input arrays properly into a 2D structured  
RSNN for computational processing. For this reason, and because such basic motor  
control capabilities are likely to be encoded in the spinal cord and other subcortical  
structures, we used for this task a 1D arrangement of neurons in order to define their  
spatial distances, rather than neocortical minicolumns. More precisely, the neurons of  
input and recurrent types were evenly-spaced distributed over a 1D line segment  $[0, 660]$   
 $\mu\text{m}$ . The locations of output neurons, organized for each output variable into two output  
types consisting of 4 neurons at the same location (see below), were optimized alongside  
the other parameters of the probabilistic skeleton. The distance measure  $\text{Dist}(i, j)$  for

## 4 Methods

neurons  $i$  and  $j$  was computed as the absolute value of the difference between their 1D coordinates.

**Input:** Time in the simulated environment was discretized to time steps of 17 ms length. For this reason, the network received each continuous-valued input value for 17 ms through population coding in one of the 9 input neuron types, each having 16 neurons. It should be noted that population coding is commonly employed in the brain to encode continuous-valued variables (Georgopoulos, Schwartz, and Kettner, 1986). The input was provided by the current state of the simulated environment. Its state space was 111 dimensional. We excluded most of them, for example angular velocities, to have a more compact and arguably biologically more realistic network input.

**Output:** The action space of the controller is given by  $\mathcal{A} = [-1, 1]^8$ , which corresponds to 8 torques applied to the 8 joints of the ant. An output torque  $y \in [-1, 1]$  of the model is computed by using two output neuron types, each consisting of 4 output neurons, representing negative and positive torques to a joint, denoted by  $J_-$  and  $J_+$ . This corresponds to motor commands in the form of firing rates to 2 antagonistic muscles for a joint. Firing activity of output neurons of the RSNN were decoded as signal to the simulated environment by computing the normalized linear combination of the spike rates over a 17 ms time step of the environment:

$$y = \frac{\sum_{t=1}^{17} e^{-\frac{17-t}{\tau_{out}}} (s^{J_-}(t) - s^{J_+}(t))}{\sum_{t=1}^{17} e^{-\frac{17-t}{\tau_{out}}} \max(s^{J_-}(t), s^{J_+}(t))}, \quad (7)$$

where  $\tau_{out} = 10$ .

**Performance measure and fitness function:** The performance measure was the same as the fitness value. The fitness was given by the total reward received from the environment, summed up over time. At every time step of 17ms length the agent received a reward

$$F(\theta) = v_{fwd} - 0.1j_l + 1, \quad (8)$$

544 where  $v_{fwd}$  is the velocity of the center of the ant in the  $x$  direction,  $j_l :=$  number of joints  
545 which are at the limit. A constant reward of 1 was added for each time step in order  
546 to induce long lasting locomotion without premature abortion of an episode because the  
547 torso touched the ground.

548 RSNN samples with 458 neurons from the optimized probabilistic skeleton produced  
549 an average fitness of 517 (standard deviation of 51.85) using 250 steps in the environ-  
550 ment, where the average was computed over 100 trials. The version of the model where  
551 30% of the recurrent neurons are randomly deleted achieved an average fitness of 331.

552

553 **Details of the probabilistic skeleton:** The probabilistic skeleton consisted of  $K = 40$

## 4 Methods

554 types, and was optimized for RSNN samples with  $N = 458$  neurons. Every input  
555 type was constrained to only form connections to one recurrent type, which did not re-  
556 ceive synaptic inputs from another input type. The other parameters were  $w_{in} = 4.75$ ,  
557  $w_E = 4.5$ ,  $w_I = 2.3$  and  $\sigma = 80.0$ .

558

559 Note: The version of the ant locomotion task that we considered differed somewhat  
560 from the version that is commonly considered in the literature (Schulman et al., 2015).  
561 There one does not assume a delay in feedback from the environment. Also, the more  
562 limited observation space that we used made it harder for the model to know in which  
563 direction it was facing, especially at a later point in the trial. This made it harder to  
564 move especially along the x-axis, which was the only direction in which locomotion was  
565 rewarded.

### 566 Details to game of life

567 **Task description:** The goal of this task is to demonstrate that a PS can generate an  
568 arbitrarily large RSNN which is capable of simulating the cellular automata game of life.

569

570 **Input generation** There is no input for this task. One could consider the initial state of  
571 the recurrent network to be the input.

572

573 **Performance measure:** There is no performance measure for this task.

574

575 **Fitness function:** There is no fitness function for this task.

576

577 **Details of the probabilistic skeleton and its optimization process:** For this task a differ-  
578 ent paradigm for spatially dependent probability scaling has been considered, see Fig.  
579 6c. The scaling parameters were  $w_E = 1$  and  $w_I = 1$ . There are no input and output  
580 types for this task. The baseline connection probabilities  $p_{I \rightarrow J}$  have not been optimized  
581 using ES. Instead they have been computed analytically. Note, that for this task very  
582 simple McCulloch-Pitts neurons have been considered. In theory, game of life should  
583 be played on an infinitely large cellular automata, but as this would require an infinite  
584 amount of resources to simulate. As our simulations only use a finite cellular automata  
585 the behavior at the boundaries can diverge from what would be expected from an infinite  
586 field.

### 587 Details to Figure 5

588 To compare the different tasks it is necessary to use for different computing tasks a  
589 common performance scale. This can be achieved by defining the baseline for every task  
590 as the performance level of a random output. For example, the computations on spike  
591 times task required a decision between 4 classes, hence picking a random class would  
592 give for a uniform distribution of classes an expected accuracy of 25%. Analogously  
593 the baseline accuracy for the spike pattern classification, which involves three classes, is

## 4 Methods

594 33.33%. The baseline for the ant was considered to be a reward of 150, which amounts  
595 to the reward received after 250 time steps without moving forward. For the highest  
596 performance was defined by the performance of the best probabilistic skeleton.

597 The performances on these different tasks were scaled by calculating for each task  
598 the difference between the theoretically best possible performance (either accuracy or  
599 normalized cross correlation) to the baseline performance and normalizing this difference  
600 to  $[0, 1]$ .

601 For panel a, each number of recurrent neuron types 80 probabilistic skeletons were  
602 optimized for every task, and the best performing ones were used for the plot.

603 For panel b, the effective weight of each individual synapse was independently per-  
604 turbed for each presynaptic spike. The amplitude of this perturbation was measured as  
605 fraction  $x$  of its current value, and the maximal fraction is indicated on the x-axis of  
606 the panel. For each value of  $x$  the noise value was drawn uniformly from the interval  
607  $[-x, x]$ . The resulting perturbed weight was set to zero if the perturbation caused its  
608 sign to change.

609

610 **Details to the comparison of neuron density, synapses numbers, and wire length with**  
611 **experimental data from the neocortex.** According to Fig. 2B of (Carlo and Stevens,  
612 2013) the number of neurons under a square mm of the neocortical sheet is in the mam-  
613 malian brain around 100,000. The number of synapses per neuron was estimated in  
614 (Braitenberg and Schüz, 2013) to be 7777, and the total length of axons per neuron was  
615 estimated to be 4.4cm. We have compared these experimental data with corresponding  
616 estimates that arise for RSNN samples from probabilistic skeletons for the computing  
617 tasks that we considered (see Table 1 in the Suppl.). For example, the RSNN for coinci-  
618 dence detection, whose firing activity and performance was shown in Fig. S2 f-h, has 2160  
619 neurons, occupies a square patch of  $0.5184mm^2$ , has 360,100 synapses, and a total wire  
620 length of 17.5m. Thus its number of neurons per square mm is by a factor 22 smaller  
621 than in the mammalian brain, the number of synapses is by a factor 1008 smaller, and  
622 its total wire length is by a factor 118 smaller than in the data. Thus, these numbers  
623 are in a reasonable range, but significantly smaller than in the experimental data. The  
624 main reason for that is that the number of neuron types that are needed for each of  
625 the computing tasks that we considered is substantially smaller than the estimated 111  
626 neuron types in mouse V1 (Tasic et al., 2018). Consistent with that, the number  $M$   
627 of neurons in a minicolumn was in our examples well below the 80 -,120 neurons in a  
628 typical neocortical minicolumn. Note that the number of synapses and total wire length  
629 grow superlinearly with the number of neuron types, (see Suppl. section 1.7 and 1.8). In  
630 addition, we only counted wire length in the horizontal direction, and ignored long-range  
631 connections.

632

633

## 4 Methods

### 634 **Acknowledgements**

635 We would like to thank Dániel Barabasi, Guozhang Chen, Peter Jonas, Eben Kadile,  
636 Robert Legenstein, Jason MacLean, Risto Miikkulainen, Franz Scherr, Kenneth Stanley,  
637 and Yuqing Zhu for helpful comments on a prior version of this manuscript. This re-  
638 search was partially supported by the Human Brain Project (Grant Agreement number  
639 785907) of the European Union. Computations were carried out on the Human Brain  
640 Project PCP Pilot Systems at the Juelich Supercomputing Centre, which received co-  
641 funding from the European Union (Grant Agreement number 604102) and on the Vienna  
642 Scientific Cluster (VSC).

### 643 **Author contributions**

644 WM and CS designed the approach, CS and DL carried out the experiments and analyzed  
645 the results, WM, CS and DL wrote the paper.

## References

### 646 References

- 647 Apfelbach, Raimund et al. (Feb. 2005). “The Effects of Predator Odors in Mammalian  
648 Prey Species: A Review of Field and Laboratory Studies”. In: *Neuroscience and biobehavioral reviews* 29, pp. 1123–44. DOI: [10.1016/j.neubiorev.2005.05.005](https://doi.org/10.1016/j.neubiorev.2005.05.005).
- 649 Barabási, Dániel L. and Taliesin Beynon (2021). “Complex Computation from Developmental Priors”. In: *bioRxiv*. DOI: [10.1101/2021.03.29.437584](https://doi.org/10.1101/2021.03.29.437584). eprint: <https://www.biorxiv.org/content/early/2021/04/12/2021.03.29.437584.full.pdf>.  
652 URL: <https://www.biorxiv.org/content/early/2021/04/12/2021.03.29.437584>.
- 653 Bhaduri, Aparna et al. (2020). “Are Organoids Ready for Prime Time?” In: *Cell stem cell* 27.3, pp. 361–365.
- 654 Billeh, Yazan N et al. (2020). “Systematic integration of structural and functional data  
655 into multi-scale models of mouse primary visual cortex”. In: *Neuron*.
- 656 Braitenberg, Valentino and Almut Schüz (2013). *Cortex: statistics and geometry of neuronal connectivity*. Springer Science & Business Media.
- 657 Brockhoff, Dimo et al. (Apr. 2010). “Mirrored Sampling and Sequential Selection for  
658 Evolution Strategies”. In: ISBN: 978-3-642-15843-8. DOI: [10.1007/978-3-642-15844-5\\_2](https://doi.org/10.1007/978-3-642-15844-5_2).
- 659 Carlo, C Nikoosh and Charles F Stevens (2013). “Structural uniformity of neocortex,  
660 revisited”. In: *Proceedings of the National Academy of Sciences* 110.4, pp. 1488–1493.
- 661 Coumans, Erwin and Yunfei Bai (2016–2021). *PyBullet, a Python module for physics simulation for games, robotics and machine learning*. <http://pybullet.org>.
- 662 Cruz, Luis et al. (2005). “A statistically based density map method for identification and  
663 quantification of regional differences in microcolumnarity in the monkey brain”. In:  
664 *Journal of Neuroscience Methods* 141.2, pp. 321–332.
- 665 DeFelipe, Javier (2015). “The anatomical problem posed by brain complexity and size:  
666 a potential solution”. In: *Frontiers in neuroanatomy* 9, p. 104.
- 667 Georgopoulos, Apostolos P, Andrew B Schwartz, and Ronald E Kettner (1986). “Neuronal  
668 population coding of movement direction”. In: *Science* 233.4771, pp. 1416–1419.
- 669 Ha, David, Andrew Dai, and Quoc V Le (2016). “Hypernetworks”. In: *arXiv preprint arXiv:1609.09106*.
- 670 Habenschuss, Stefan, Zeno Jonke, and Wolfgang Maass (2013). “Stochastic computations  
671 in cortical microcircuit models”. In: *PLoS computational biology* 9.11, e1003311.
- 672 Han, Feng, Natalia Caporale, and Yang Dan (2008). “Reverberation of recent visual  
673 experience in spontaneous cortical waves”. In: *Neuron* 60.2, pp. 321–327.
- 674 Harris, Kenneth and Gordon Shepherd (Feb. 2015). “The neocortical circuit: Themes  
675 and variations”. In: *Nature neuroscience* 18, pp. 170–181. DOI: [10.1038/nrn.3917](https://doi.org/10.1038/nrn.3917).
- 676 Holtmaat, Anthony and Karel Svoboda (2009). “Experience-dependent structural synaptic  
677 plasticity in the mammalian brain”. In: *Nature Reviews Neuroscience* 10.9, pp. 647–  
678 658.
- 679 Keller, Georg B and Thomas D Mrsic-Flogel (2018). “Predictive processing: a canonical  
680 cortical computation”. In: *Neuron* 100.2, pp. 424–435.
- 681 Koulakov, Alexei, Sergey Shuvaev, and Anthony Zador (2021). “Encoding innate ability  
682 through a genomic bottleneck”. In: *bioRxiv*. DOI: [10.1101/2021.03.16.435261](https://doi.org/10.1101/2021.03.16.435261).
- 683  
684  
685  
686  
687  
688



## References

- 689 eprint: [https://www.biorxiv.org/content/early/2021/03/16/2021.03.16.](https://www.biorxiv.org/content/early/2021/03/16/2021.03.16.435261.full.pdf)  
690 [435261.full.pdf](https://www.biorxiv.org/content/early/2021/03/16/2021.03.16.435261). URL: [https://www.biorxiv.org/content/early/2021/03/16/](https://www.biorxiv.org/content/early/2021/03/16/2021.03.16.435261)  
691 [2021.03.16.435261](https://www.biorxiv.org/content/early/2021/03/16/2021.03.16.435261).
- 692 Langston, Rosamund et al. (June 2010). “Development of the Spatial Representation  
693 System in the Rat”. In: *Science (New York, N.Y.)* 328, pp. 1576–80. DOI: [10.1126/](https://doi.org/10.1126/science.1188210)  
694 [science.1188210](https://doi.org/10.1126/science.1188210).
- 695 Markram, Henry et al. (Oct. 2015). “Reconstruction and Simulation of Neocortical Mi-  
696 crocircuitry”. In: *Cell* 163, pp. 456–492. DOI: [10.1016/j.cell.2015.09.029](https://doi.org/10.1016/j.cell.2015.09.029).
- 697 Mckone, Elinor, Kate Crookes, and Nancy Kanwisher (Jan. 2009). “The Cognitive and  
698 Neural Development of Face Recognition in Humans”. In: *The Cognitive Neurosciences*  
699 Vol. 4.
- 700 Metz, Hillery et al. (Nov. 2017). “Evolution and Genetics of Precocious Burrowing Behav-  
701 ior in *Peromyscus* Mice”. In: *Current Biology* 27. DOI: [10.1016/j.cub.2017.10.061](https://doi.org/10.1016/j.cub.2017.10.061).
- 702 Mountcastle, Vernon B (1998). *Perceptual neuroscience: the cerebral cortex*. Harvard  
703 University Press.
- 704 Perin, Rodrigo, Thomas K Berger, and Henry Markram (2011). “A synaptic organizing  
705 principle for cortical neuronal groups”. In: *Proceedings of the National Academy of*  
706 *Sciences* 108.13, pp. 5419–5424.
- 707 Plank, Philipp et al. (2022). “A Long Short-Term Memory for AI Applications in Spike-  
708 based Neuromorphic Hardware”. In: *Nature Machine Intelligence, in press*.
- 709 Randazzo, Ettore et al. (2020). “Self-classifying MNIST digit CA”. In: *Distill*. URL:  
710 <https://distill.pub/2020/selforg/mnist/>.
- 711 Rendell, Paul (2011). “A universal turing machine in conway’s game of life”. In: *2011 In-*  
712 *ternational Conference on High Performance Computing & Simulation*. IEEE, pp. 764–  
713 772.
- 714 Salimans, Tim et al. (2017). “Evolution strategies as a scalable alternative to reinforce-  
715 ment learning”. In: *arXiv preprint arXiv:1703.03864*.
- 716 Sandler, Mark et al. (2020). “Image segmentation via cellular automata”. In: *arXiv*  
717 *preprint arXiv:2008.04965*.
- 718 Schaul, Tom, Tobias Glasmachers, and Jürgen Schmidhuber (2011). “High dimensions  
719 and heavy tails for natural evolution strategies”. In: *Proceedings of the 13th annual*  
720 *conference on Genetic and evolutionary computation*, pp. 845–852.
- 721 Schulman, John et al. (2015). “High-dimensional continuous control using generalized  
722 advantage estimation”. In: *arXiv preprint arXiv:1506.02438*.
- 723 Soare, Robert I (2016). *Turing computability: Theory and applications*. Springer.
- 724 Song, Sen et al. (2005). “Highly nonrandom features of synaptic connectivity in local  
725 cortical circuits”. In: *PLoS biology* 3.3, e68.
- 726 Stanley, Kenneth O et al. (2019). “Designing neural networks through neuroevolution”.  
727 In: *Nature Machine Intelligence* 1.1, pp. 24–35.
- 728 Tasic, Bosiljka et al. (2018). “Shared and distinct transcriptomic cell types across neo-  
729 cortical areas”. In: *Nature* 563.7729, pp. 72–78.
- 730 Teeter, Corinne et al. (Feb. 2018). “Generalized leaky integrate-and-fire models classify  
731 multiple neuron types”. In: *Nature Communications* 9. DOI: [10.1038/s41467-017-](https://doi.org/10.1038/s41467-017-02717-4)  
732 [02717-4](https://doi.org/10.1038/s41467-017-02717-4).

## References

- 733 Tinbergen, Nikolaas (2020). *The study of instinct*. Pygmalion Press, an imprint of Plun-  
734 kett Lake Press.
- 735 *V1 Network Models from the Allen Institute* (n.d.). URL: [https://www.dropbox.com/  
736 sh/w5u31m3hq6u2x5m/AACpYpeWnm6s\\_qJDpmgrYgP7a?dl=0](https://www.dropbox.com/sh/w5u31m3hq6u2x5m/AACpYpeWnm6s_qJDpmgrYgP7a?dl=0).
- 737 Vezoli, Julien et al. (2021). “Cortical hierarchy, dual counterstream architecture and the  
738 importance of top-down generative networks”. In: *Neuroimage* 225, p. 117479.
- 739 Weber, Jesse and Hopi Hoekstra (Mar. 2009). “The evolution of burrowing behavior in  
740 deer mice (genus *Peromyscus*)”. In: *Animal Behaviour* 77, pp. 603–609. DOI: [10.1016/  
741 j.anbehav.2008.10.031](https://doi.org/10.1016/j.anbehav.2008.10.031).
- 742 Wierstra, Daan et al. (2008). “Natural evolution strategies”. In: *2008 IEEE Congress on  
743 Evolutionary Computation (IEEE World Congress on Computational Intelligence)*.  
744 IEEE, pp. 3381–3387.
- 745 Yasumatsu, Nobuaki et al. (2008). “Principles of long-term dynamics of dendritic spines”.  
746 In: *Journal of Neuroscience* 28.50, pp. 13592–13608.
- 747 Yilmaz, Melis and Markus Meister (Oct. 2013). “Rapid Innate Defensive Responses of  
748 Mice to Looming Visual Stimuli”. In: *Current biology : CB* 76. DOI: [10.1016/j.cub.  
749 2013.08.015](https://doi.org/10.1016/j.cub.2013.08.015).
- 750 Zador, Anthony (Dec. 2019). “A critique of pure learning and what artificial neural  
751 networks can learn from animal brains”. In: *Nature Communications* 10. DOI: [10.  
752 1038/s41467-019-11786-6](https://doi.org/10.1038/s41467-019-11786-6).
