# Supplementary material for: Structure induces computational function in networks with diverse types of spiking neurons
Source: bioRxiv or medRxiv preprint supplement (doi:10.1101/2021.05.18.444689), 2022-07-06
Supplement: Supplementary file [file media-1.pdf]

1 Supplemental material to "Probabilistic skeletons  
2 endow brain-like neural networks with innate  
3 computing capabilities"

4 Christoph Stöckl <sup>\*1</sup>, Dominik Lang <sup>\*1</sup>, and Wolfgang Maass <sup>1</sup>

5 <sup>1</sup>*Institute of Theoretical Computer Science, Graz University of Technology, Austria*

6 July 1, 2021

7 **List of Figures**

|    |    |                                                                                 |   |
|----|----|---------------------------------------------------------------------------------|---|
| 8  | S1 | Spiking activity on the computations on spike times task. The model             |   |
| 9  |    | correctly assigns the input to class 1. . . . .                                 | 2 |
| 10 | S2 | Spiking activity on the computations on spike times. The model correctly        |   |
| 11 |    | assigns the input to class 2. . . . .                                           | 3 |
| 12 | S3 | Spiking activity on the computations on spike times. The model correctly        |   |
| 13 |    | assigns the input to class 4. . . . .                                           | 4 |
| 14 | S4 | The temporal dynamics $I_{syn}(t)$ of the four different synapse types, as used |   |
| 15 |    | in [1]. . . . .                                                                 | 5 |
| 16 | S5 | Full connection probabilities of the probabilistic skeleton on the ant task.    |   |
| 17 |    | Note, that input types were restricted to only connect to one exclusive         |   |
| 18 |    | recurrent type. . . . .                                                         | 6 |
| 19 | S6 | Illustration of population coding. . . . .                                      | 6 |

20 **Contents**

|    |          |                                   |          |
|----|----------|-----------------------------------|----------|
| 21 | <b>1</b> | <b>Supplementary figures</b>      | <b>2</b> |
| 22 | <b>2</b> | <b>Supplementary notes</b>        | <b>7</b> |
| 23 | 2.1      | Continuous neuron model . . . . . | 7        |

---

\*These authors contributed equally.

|    |     |                                                                       |    |
|----|-----|-----------------------------------------------------------------------|----|
| 24 | 2.2 | Synapse model . . . . .                                               | 7  |
| 25 | 2.3 | Computation of the neuron prevalence . . . . .                        | 8  |
| 26 | 2.4 | One-hot encoding . . . . .                                            | 9  |
| 27 | 2.5 | Derivation of the expected number of synaptic connections of a single |    |
| 28 |     | neuron . . . . .                                                      | 9  |
| 29 | 2.6 | Expected wire length . . . . .                                        | 10 |
| 30 | 2.7 | Population coding . . . . .                                           | 11 |
| 31 | 2.8 | Hardware specifications . . . . .                                     | 12 |

## 32 1 Supplementary figures

### 33 Additional spike rasters for the computations on spike times

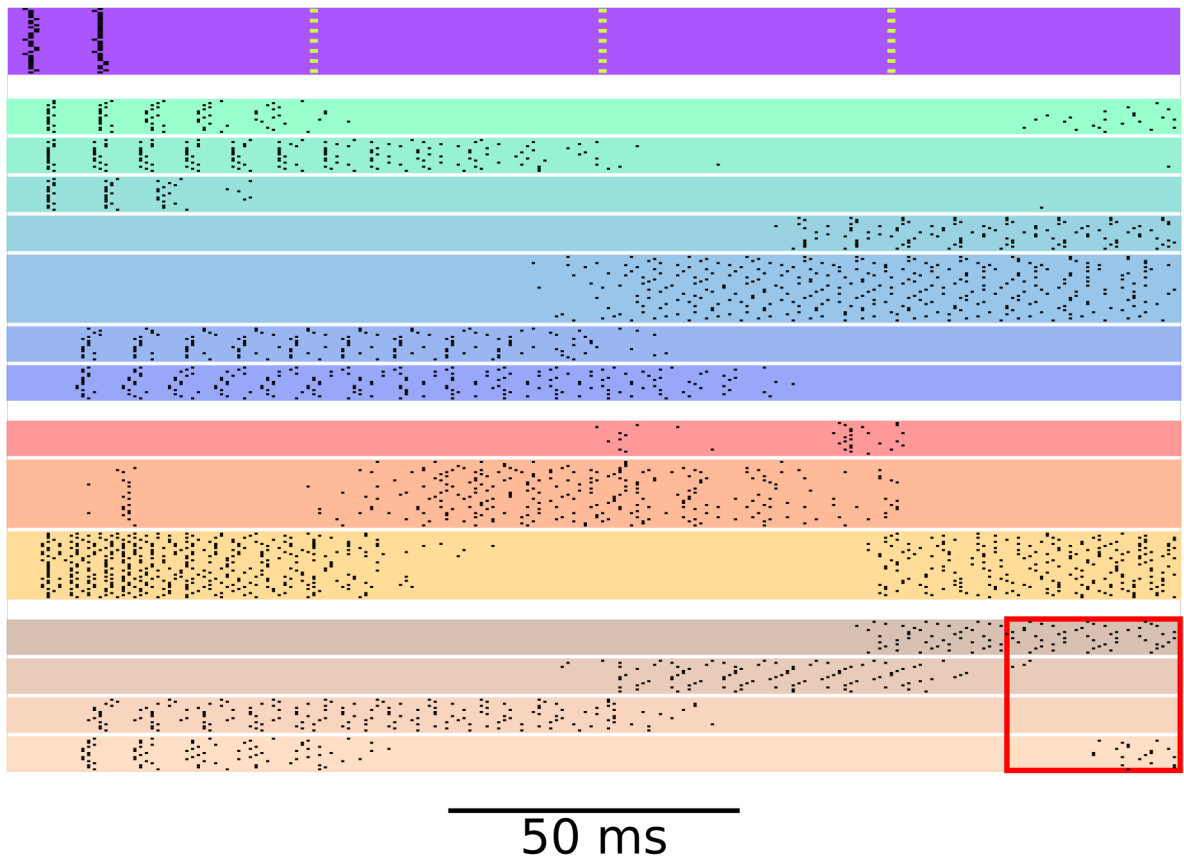

**Figure S1:** Spiking activity on the computations on spike times task. The model correctly assigns the input to class 1.

1 Supplementary figures

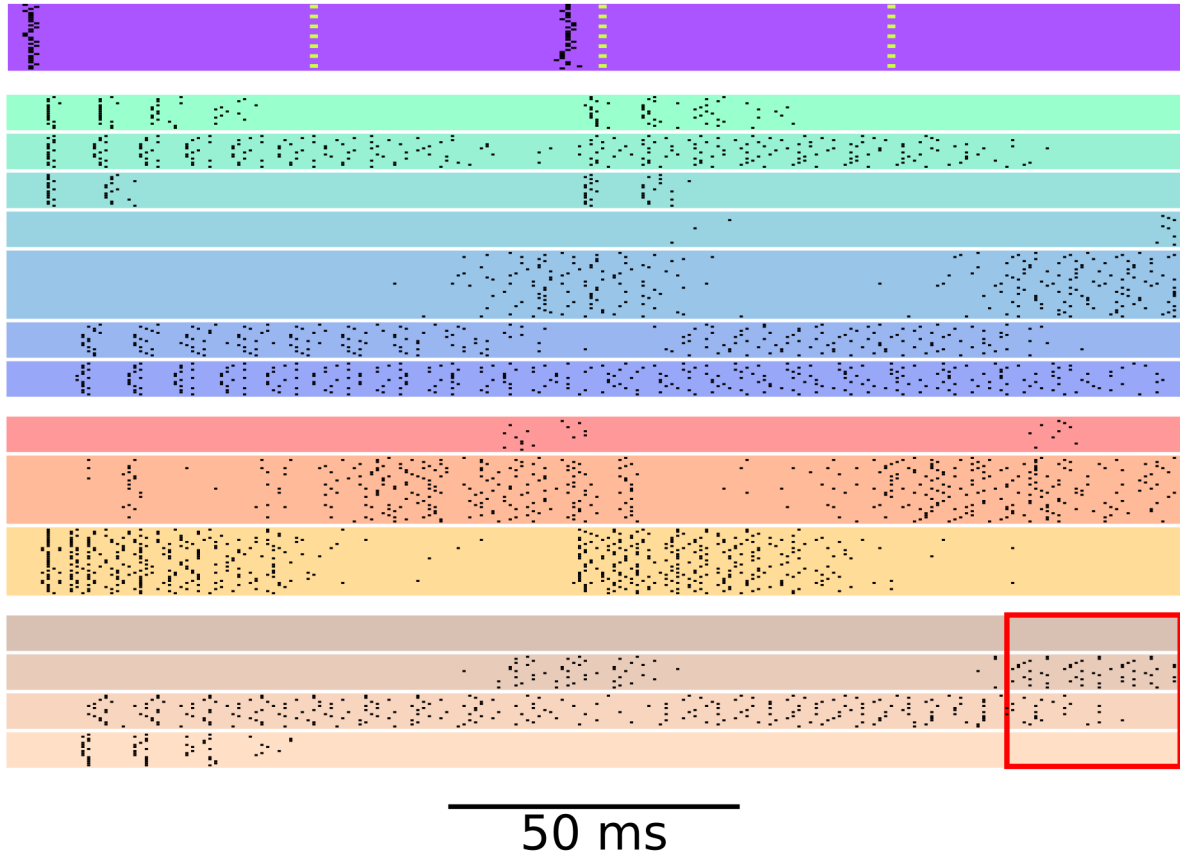

**Figure S2:** Spiking activity on the computations on spike times. The model correctly assigns the input to class 2.

1 Supplementary figures

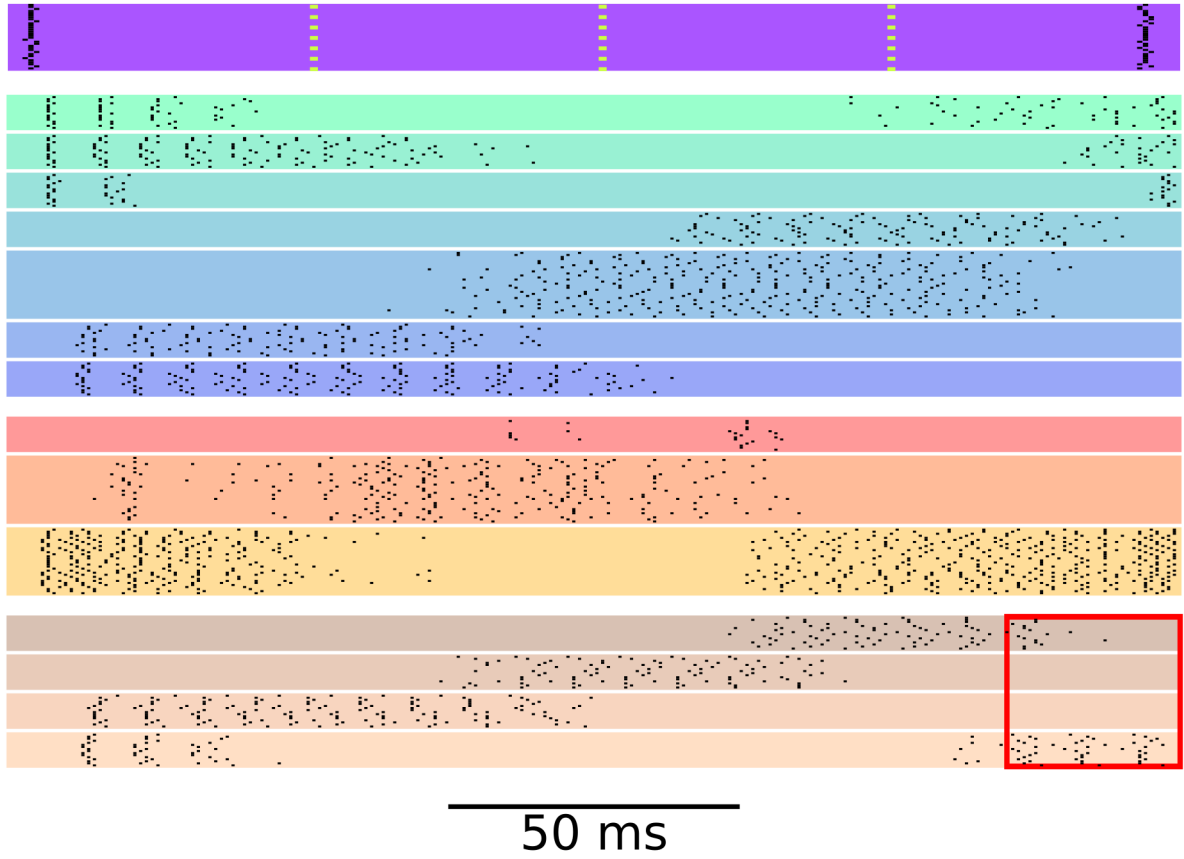

**Figure S3:** Spiking activity on the computations on spike times. The model correctly assigns the input to class 4.

34 **Responses of the four different synapse types**

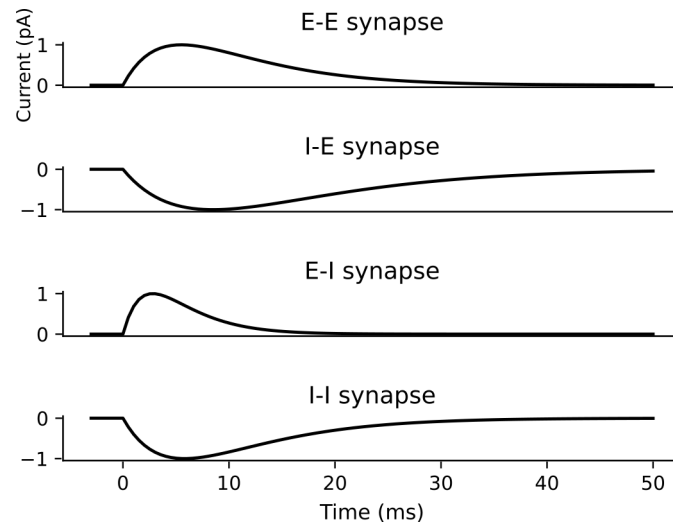

**Figure S4:** The temporal dynamics  $I_{syn}(t)$  of the four different synapse types, as used in [1].

35 **Connection probabilities for ant, including connections of input and**  
 36 **output neuron types**

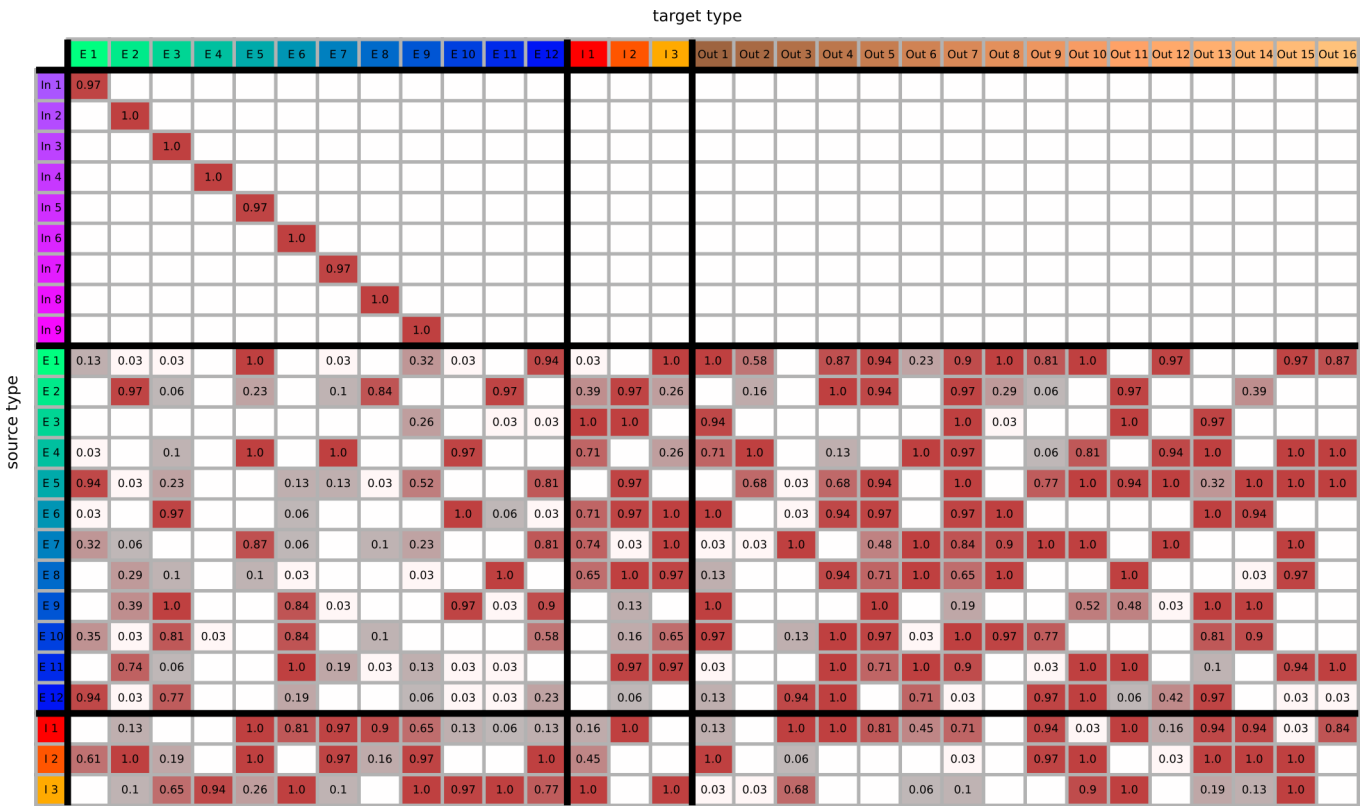

**Figure S5:** Full connection probabilities of the probabilistic skeleton on the ant task. Note, that input types were restricted to only connect to one exclusive recurrent type.

37 **Illustration of population coding.**

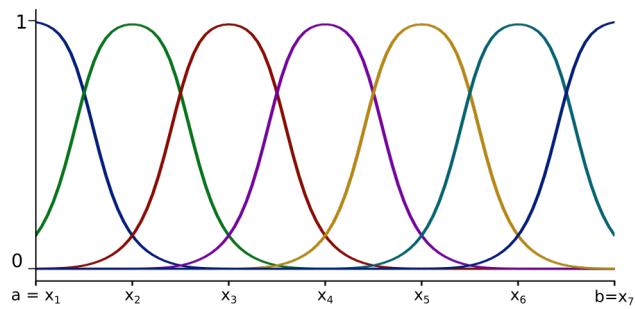

**Figure S6:** Illustration of population coding.

## 2 Supplementary notes

### 2.1 Continuous neuron model

For a given neuron  $j \in \{1, \dots, N\}$  of type  $J$  we denote by  $V_j : \mathbb{R} \rightarrow \mathbb{R}$  the membrane potential and by  $I_j : \mathbb{R} \rightarrow \mathbb{R}$  the input current. We used different parameters for excitatory and inhibitory neurons that were based on experimental data, see below. Hence these parameters depend for a neuron of type  $J$  on whether this is an excitatory or inhibitory neuron type. But for simplicity we will drop in our notation the dependence of the neuron model on the neuron type  $J$  until the section below on parameters for neuron and synapse models.

For example, for the membrane conductance we could write  $C_m^J \in \mathbb{R}$ . Since we will assume for the whole section that we use the same type  $J$  we will drop this superscript to simplify the notation, hence

$$C_m = C_m^J.$$

We denote by  $\tau \in \mathbb{R}$  the membrane time constant and by  $E_L \in \mathbb{R}$  the resting potential. The classic leaky integrate-and-fire linear differential equations reads

$$\tau \frac{dV_j(t)}{dt} = -(V_j(t) - E_L) + \frac{1}{C_m} I_j(t). \quad (1)$$

If the voltage is above the threshold  $v_{th}$  the parameters get updated by

$$V_j(t+) \leftarrow V_r; \quad j = 1, \dots, N, \quad (2)$$

where  $V_r \in \mathbb{R}$  is the reset voltage.

### 2.2 Synapse model

The time course of a postsynaptic current is modeled like in [1] by a linear increase followed by an exponential decay:

$$I_{syn}(t) = \frac{e}{\tau_{syn}} t \delta t e^{-\frac{t\delta t}{\tau_{syn}}}, \quad t \in \mathbb{N}. \quad (3)$$

$\tau_{syn}$  is the synaptic time constant after which the current amplitude will be at its maximum. Note that  $\tau_{syn}$  depends on the types of the pre- and postsynaptic neurons. The exact values of  $\tau_{syn}$  have been set to 5.5 ms for excitatory-to-excitatory synapses, 8.5 ms for inhibitory-to-excitatory synapses, 2.8 ms for excitatory-to-inhibitory synapses and 5.8 ms for inhibitory-to-inhibitory synapses, according to [1]. The current will be negative for synapses from inhibitory neurons. The resulting postsynaptic currents can be seen in Figure S4.

These currents  $I_{syn}(t)$  are scaled for each synapse by a general scaling factor  $w$  equal to  $w_{in}$ ,  $w_E$ , or  $w_I$ , depending on whether the presynaptic neuron is an input neuron, or some other excitatory or inhibitory neuron. Furthermore, they are multiplied for a

synaptic connection from neuron  $i$  to neuron  $j$  by the number  $m_{ij}$  of synaptic connections from  $i$  to  $j$ . Hence, the current from neuron  $i$  to neuron  $j$  at time  $t$  can be written in terms of the spike train  $z_i(s)$  of the presynaptic neuron as

$$I_{ij}(t) = \sum_{k=0}^{t-1} \frac{w m_{ij} z_i(k)}{\tau_{syn}} e^{-(t-k)\delta t} e^{-\frac{(t-k)\delta t}{\tau_{syn}}}. \quad (4)$$

56 The input current  $I_j(t)$  for neuron  $j$  at time  $t$  is defined as the sum of these currents  
57 over all presynaptic neurons  $i$ .

58 Note, that there is a transmission delay from the creation of a spike until the arrival  
59 at a synapse. For excitatory neurons this transmission delay is 3ms and for inhibitory  
60 neurons it is 2ms.

## 61 2.3 Computation of the neuron prevalence

62 For the optimization of probabilistic skeletons it is convenient to define neuron preva-  
63 lences as real values:  $p_I$  of type  $I$  is a real value that correlates to the fraction of neurons  
64 which will belong to type  $I$  in a generic minicolumn. In order to compute a correspond-  
65 ing assignment of the neurons in a minicolumn to the neuron types we procede as follows:  
66 We apply the softmax function, followed by an adjustment procedure which makes sure  
67 that every type has at least one neuron per column and that the total number of neurons  
68 stays constant.

69 The exact algorithm used to obtain the number of neurons per type can be found in  
70 algorithm 2.

---

**Algorithm 2** Algorithm for computing the number of neurons per type using the preva-  
lence  $p$ , the number of minicolumns  $n_{mcol}$  and the total number of recurrent neurons  
 $N_{rec} = (K + 3) \cdot n_{mcol}$  (For the contrast enhancement task it is  $N_{rec} = (K + 2) \cdot n_{mcol}$ .  
The floor function rounds its argument down to the next integer, the maximum function  
returns the higher valued argument, argsort returns a list of sorted indices, pointing to  
the highest elements in the argument array first, and the  $+=$  operator increments a  
variable by the amount on the right side.

---

**Require:**  $p, N_{rec}, n_{mcol}$ ,  
frac = softmax( $p$ )  
nnpt = frac ·  $N_{rec}$   
nnpt = floor(nnpt/ $n_{mcol}$ )  
nnpt = maximum(nnpt,  $n_{mcol}$ )  
diff = frac ·  $N_{rec}$  - nnpt  
max\_idx = argsort(diff)  
overlap = floor( $(N_{rec} - \text{sum}(\text{nnpt})) / n_{mcol}$ )  
**for**  $k = 1, \dots, \text{overlap}$  **do**  
    nnpt[max\_idx[k]] +=  $n_{mcol}$   
**end for**  
**return** nnpt

---



## 2.4 One-hot encoding

To convert the target label  $y$  to a one-hot encoded vector one first creates a vector with a length equal to the number of classes consisting only of zeros. Then at the position  $y - 1$  the value 1 is entered.

For example, if one considers a setting with four classes and the target class is  $y = 3$  this would yield a vector of:

$$\begin{bmatrix} 0 \\ 0 \\ 1 \\ 0 \end{bmatrix}. \quad (5)$$

## 2.5 Derivation of the expected number of synaptic connections of a single neuron

To derive the expected number of outgoing synapses  $ST(i)$  a neuron  $i$  can form, we consider an infinitely large grid of minicolumns. To obtain the desired estimate one can consider neighboring minicolumns to be located on concentric squares around the source neuron  $i$ .

Let the function  $f(k)$  denote the number of columns in the  $k$ th concentric square:

$$f(k) = \begin{cases} 1 & \text{if } k = 0 \\ 8k & \text{else} \end{cases}. \quad (6)$$

Then the expected number of outgoing synapses from neuron  $i$  can be written as:

$$ST(i) = \sum_{k=0}^{\infty} \sum_J f(k) M_J S p_{I \rightarrow J} e^{-\left(\frac{\alpha k}{\sigma}\right)^2}. \quad (7)$$

, where the first  $k$  will sum over all concentric squares,  $M_J$  is the number of neurons of type  $J$  in a minicolumn,  $S = 8$  is the maximum number of synapses between two neurons,  $\alpha = 60\mu m$ , and  $\sigma$  accounts for the distance decay. Note, using  $\alpha = 60\mu m$  will yield an upper bound, as the distance to most minicolumns on the concentric square  $k$  will be larger than  $\alpha k$ .

An upper bound of this equation is of interest and can be derived:

$$ST(i) = \sum_{k=0}^{\infty} \sum_J f(k) M_J S p_{I \rightarrow J} e^{-\left(\frac{\alpha k}{\sigma}\right)^2} \quad (8)$$

$$= S \sum_J M_J p_{I \rightarrow J} \sum_{k=0}^{\infty} f(k) \gamma^{k^2} \quad (9)$$

, where

$$\gamma = e^{\left(\frac{\alpha}{\sigma}\right)^2}. \quad (10)$$

Breaking up the function  $f(k)$  yields:

$$ST(i) = S \sum_J M_{Jp_{I \rightarrow J}} \left( 1 + 8 \sum_{k=1}^{\infty} k \gamma^{k^2} \right). \quad (11)$$

We get an upper bound by using a standard estimate for the geometric series:

$$S \sum_J M_{Jp_{I \rightarrow J}} \left( 1 + 8 \sum_{k=1}^{\infty} k \gamma^{k^2} \right) < S \sum_J M_{Jp_{I \rightarrow J}} \left( 1 + 8 \sum_{k=1}^{\infty} k \gamma^k \right) \quad (12)$$

$$= S \sum_J M_{Jp_{I \rightarrow J}} \left( 1 + 8 \frac{\gamma}{(1-\gamma)^2} \right). \quad (13)$$

91 Note that this upper bound does not contain anymore an infinite sum.

## 92 2.6 Expected wire length

93 An upper bound for the expected wire length can be computed in a similar fashion. The  
94 expected wire length per neuron can be written as:

$$WL(i) = \sum_{k=1}^{\infty} f(k) \sum_J \alpha k M_{Jp_{I \rightarrow J}} \left( 1 - \left( 1 - e^{-\left(\frac{\alpha k}{\sigma}\right)^2} \right)^S \right) \quad (14)$$

95 Note, that although there can be up to  $S$  synapses between two given neurons, but  
96 the wire distance is only counted once, based on the assumption that multiple synaptic  
97 connections to the same neuron are implemented by axonal connections that branch only  
98 locally, so that the additional wire length caused by the branching can be neglected.

A similar upper bound can be computed for the wire length, when one assumes  $S = 1$ :

$$WL(i) = \sum_{k=1}^{\infty} \sum_J \alpha k f(k) M_{Jp_{I \rightarrow J}} e^{-\left(\frac{\alpha k}{\sigma}\right)^2} \quad (15)$$

$$= \alpha \sum_J M_{Jp_{I \rightarrow J}} \sum_{k=1}^{\infty} k f(k) \gamma^{k^2} \quad (16)$$

99 , where

$$\gamma = e^{-\left(\frac{\alpha}{\sigma}\right)^2}. \quad (17)$$

Replacing the function  $f(k)$  yields:

$$WL(i) = 8\alpha \sum_J M_{Jp_{I \rightarrow J}} \left( \sum_{k=1}^{\infty} k^2 \gamma^{k^2} \right). \quad (18)$$

We get an upper bound by using a standard estimate for the geometric series:

$$8\alpha \sum_J M_{Jp_{I \rightarrow J}} \left( \sum_{k=1}^{\infty} k^2 \gamma^{k^2} \right) < 8\alpha \sum_J M_{Jp_{I \rightarrow J}} \left( \sum_{k=1}^{\infty} k^2 \gamma^k \right) \quad (19)$$

$$= 8\alpha \sum_J M_{Jp_{I \rightarrow J}} \left( \frac{\gamma(\gamma+1)}{(1-\gamma)^3} \right). \quad (20)$$

100 . Note that this upper bound does not contain anymore an infinite sum.

For a more general upper bound where  $S > 1$  one can consider  $S$  RSNNs superimposed, resulting in:

$$WL(i) \leq 8\alpha S \sum_J M_{Jp_{I \rightarrow J}} \left( \frac{\gamma(\gamma+1)}{(1-\gamma)^3} \right). \quad (21)$$

101

102

103 **Sparsity and wire length of RSNN samples:** Table 1 shows the average values of con-  
 104 nection sparsity and the total wire length from RSNNs generated by the probabilistic  
 105 skeletons for each tasks. The sparsity refers to the fraction of synaptic connections  
 106 between neurons  $i$  and  $j$  that are realized, i.e.  $m_{ij} > 0$ .

| Task                          | # of neurons | Sparsity | Avg. # synapses | Wire length |
|-------------------------------|--------------|----------|-----------------|-------------|
| Spike interval classification | 304          | 24.6%    | 47,700          | 1.27m       |
| Spike pattern classification  | 148          | 37.8%    | 30,500          | 0.595m      |
| Contrast enhancement          | 200          | 16.03%   | 4,810           | 0.505m      |
| Coincidence detection         | 375          | 15.44%   | 54,000          | 1.47m       |
| Ant                           | 458          | 11.24%   | 52,700          | 0.79m       |

**Table 1:** Number of neurons, average connection sparsity, average number of synapses and wire length of RSNNs emerging from the probabilistic skeletons on the different tasks. On the contrast enhancement and the coincidence detection task the RSNNs consisting of 25 minicolumns were considered. Note that the number of synapses in an RSNN will vary between different samples from the same probabilistic skeleton. Hence, the average over 5 RSNN samples has been considered for this value.

## 107 2.7 Population coding

Each continuous-valued input value is encoded by the spiking activity of an excitatory population of  $N_{\text{pop}}$  input neurons. An input variable  $x$  can only take values in the bounded interval  $(a, b] \subset \mathbb{R}$ . We define points  $a = x_1, \dots, x_M = b$  such that the subintervals  $(x_k, x_{k+1}]$ ,  $k = 0, \dots, N_{\text{pop}}$  are of equal lengths  $\frac{b-a}{N_{\text{pop}}-1}$  and disjointly overlap the interval. The neurons are chosen such that there is a positive linear dependency between the input values and the spatial position of the neurons. On these subintervals gaussian

density functions are used to model the probability that a neuron  $i$  spikes for a given input  $x \in (a, b]$  by first defining

$$h_k(x) = \frac{1}{\sigma_{pop}\sqrt{2\pi}} \exp \left\{ -\frac{1}{2} \left( \frac{x - x_k}{\sigma_{pop}} \right)^2 \right\} \quad (22)$$

108 for  $k = 1, \dots, N_{pop}$ , where  $\sigma_{pop} \in \mathbb{R}$ . In the experiments it is chosen to be  $\sigma_{pop} =$   
 109  $\frac{x_{k+1} - x_{k-1}}{2}$ , such that  $\sim 68.27\%$  of spiking activity for this type happens in the interval  
 110  $(x_{k-1}, x_{k+1}]$  and  $\sim 95.45\%$  happens in the interval  $(x_{k-2}, x_{k+2}]$  for suitable  $k$ . Since this  
 111 is modeled by a density function it is necessary to normalize the values of  $h_k$  to obtain  
 112 spike probabilities for each neuron. A schematic plot of the population coding is given  
 113 in Figure S4.

The spike train  $z_i : \mathbb{R} \rightarrow \mathbb{R}$  for an input neuron  $i$  and an input value  $x$  is therefore given as

$$z_i(t) = \begin{cases} 1 & \text{with probability } \frac{h_i(x)}{\max_{x \in [a, b]} h_i(x)} \\ 0 & \text{else.} \end{cases} \quad (23)$$

## 114 2.8 Hardware specifications

115 Most of our experiments were conducted using  $2 \times$  AMD EPYC Rome 7402 CPUs with  
 116  $2 \times 24$  cores and 2.8 GHz,  $4 \times$  NVIDIA A100 GPU and  $4 \times 40$  GB HBM2e (Juwels  
 117 Booster)

## 118 References

119 [1] Yazan N Billeh et al. “Systematic integration of structural and functional data into  
 120 multi-scale models of mouse primary visual cortex”. In: *Neuron* (2020).
